# Supplementary material for: Evaluation of Shear Capacity of Steel Fiber Reinforced Concrete Beams without Stirrups Using Artificial Intelligence Models
Source: MDPI journal article supplement (doi:10.3390/ma15072407), 2022-03-24
Supplement: s1 [file s1]

**Table S1. Appendix File Database information of experimental SFRC beams without stirrups**  
**(This database was originally collected by Lantsoght [28], it is rephrased the data structure in this work)**

| Source       | $b$ [mm] | $h$ [mm] | $d$ [mm] | $a/d$ | $f_c$ [MPa] | $s_{max}$ [mm] | $\rho_s$ [%] | Fiber type | $\rho_f$ | $f_f$ [MPa] | $V_f$ [%] | $d_f$ [mm] | $L_f/d_f$ | $F$ [%] | $V_u$ [kN] |
|--------------|----------|----------|----------|-------|-------------|----------------|--------------|------------|----------|-------------|-----------|------------|-----------|---------|------------|
| Singh & Jain | 150      | 300      | 251      | 3.49  | 28.1        | 12.5           | 2.67         | Hooked     | 1.00     | 1100        | 0.75      | 0.55       | 65        | 48.75   | 113.8      |
|              | 150      | 300      | 251      | 3.49  | 25.3        | 12.5           | 2.67         | Hooked     | 1.00     | 1100        | 0.75      | 0.55       | 65        | 48.75   | 79.9       |
|              | 150      | 300      | 251      | 3.49  | 27.9        | 12.5           | 2.67         | Hooked     | 1.00     | 1100        | 1.00      | 0.55       | 65        | 65.00   | 110.0      |
|              | 150      | 300      | 251      | 3.49  | 26.2        | 12.5           | 2.67         | Hooked     | 1.00     | 1100        | 1.00      | 0.55       | 65        | 65.00   | 124.3      |
|              | 150      | 300      | 251      | 3.49  | 28.1        | 12.5           | 2.67         | Hooked     | 1.00     | 1100        | 1.50      | 0.55       | 65        | 97.50   | 111.9      |
|              | 150      | 300      | 251      | 3.49  | 27.3        | 12.5           | 2.67         | Hooked     | 1.00     | 1100        | 1.50      | 0.55       | 65        | 97.50   | 131.8      |
|              | 150      | 300      | 251      | 3.49  | 27.5        | 12.5           | 2.67         | Hooked     | 1.00     | 1050        | 0.50      | 0.75       | 80        | 40.00   | 65.6       |
|              | 150      | 300      | 251      | 3.49  | 24.9        | 12.5           | 2.67         | Hooked     | 1.00     | 1050        | 0.50      | 0.75       | 80        | 40.00   | 78.0       |
|              | 150      | 300      | 251      | 3.49  | 27.8        | 12.5           | 2.67         | Hooked     | 1.00     | 1050        | 0.75      | 0.75       | 80        | 60.00   | 91.9       |
|              | 150      | 300      | 251      | 3.49  | 27.3        | 12.5           | 2.67         | Hooked     | 1.00     | 1050        | 0.75      | 0.75       | 80        | 60.00   | 102.5      |
|              | 150      | 300      | 251      | 3.49  | 26.3        | 12.5           | 2.67         | Hooked     | 1.00     | 1050        | 1.00      | 0.75       | 80        | 80.00   | 116.8      |
|              | 150      | 300      | 251      | 3.49  | 27.1        | 12.5           | 2.67         | Hooked     | 1.00     | 1050        | 1.00      | 0.75       | 80        | 80.00   | 105.5      |
|              | 150      | 300      | 251      | 3.49  | 53.4        | 12.5           | 2.67         | Hooked     | 1.00     | 1100        | 0.75      | 0.55       | 65        | 48.75   | 113.8      |
|              | 150      | 300      | 251      | 3.49  | 54.1        | 12.5           | 2.67         | Hooked     | 1.00     | 1100        | 0.75      | 0.55       | 65        | 48.75   | 126.6      |
|              | 150      | 300      | 251      | 3.49  | 53.2        | 12.5           | 2.67         | Hooked     | 1.00     | 1100        | 1.00      | 0.55       | 65        | 65.00   | 145.0      |
|              | 150      | 300      | 251      | 3.49  | 55.3        | 12.5           | 2.67         | Hooked     | 1.00     | 1100        | 1.00      | 0.55       | 65        | 65.00   | 166.5      |
|              | 150      | 300      | 251      | 3.49  | 64.6        | 12.5           | 2.67         | Hooked     | 1.00     | 1100        | 1.50      | 0.55       | 65        | 97.50   | 196.2      |
|              | 150      | 300      | 251      | 3.49  | 59.9        | 12.5           | 2.67         | Hooked     | 1.00     | 1100        | 1.50      | 0.55       | 65        | 97.50   | 160.8      |
|              | 150      | 300      | 251      | 3.49  | 47.8        | 12.5           | 2.67         | Hooked     | 1.00     | 1050        | 0.50      | 0.75       | 80        | 40.00   | 128.5      |
|              | 150      | 300      | 251      | 3.49  | 49.5        | 12.5           | 2.67         | Hooked     | 1.00     | 1050        | 0.50      | 0.75       | 80        | 40.00   | 152.9      |
|              | 150      | 300      | 251      | 3.49  | 55.3        | 12.5           | 2.67         | Hooked     | 1.00     | 1050        | 0.75      | 0.75       | 80        | 60.00   | 147.3      |
|              | 150      | 300      | 251      | 3.49  | 56.4        | 12.5           | 2.67         | Hooked     | 1.00     | 1050        | 0.75      | 0.75       | 80        | 60.00   | 178.9      |
|              | 150      | 300      | 251      | 3.49  | 53.4        | 12.5           | 2.67         | Hooked     | 1.00     | 1050        | 1.00      | 0.75       | 80        | 80.00   | 128.8      |
|              | 150      | 300      | 251      | 3.49  | 51.0        | 12.5           | 2.67         | Hooked     | 1.00     | 1050        | 1.00      | 0.75       | 80        | 80.00   | 157.8      |
|              | 150      | 300      | 251      | 3.49  | 27.8        | 12.5           | 2.67         | Crimped    | 0.75     | 1025        | 1.00      | 0.60       | 50        | 37.50   | 79.5       |
|              | 150      | 300      | 251      | 3.49  | 27.2        | 12.5           | 2.67         | Crimped    | 0.75     | 1025        | 1.00      | 0.60       | 50        | 37.50   | 78.8       |
|              | 150      | 300      | 251      | 3.49  | 27.6        | 12.5           | 2.67         | Crimped    | 0.75     | 1050        | 1.00      | 0.70       | 85        | 63.75   | 99.5       |
|              | 150      | 300      | 251      | 3.49  | 27.9        | 12.5           | 2.67         | Crimped    | 0.75     | 1050        | 1.00      | 0.70       | 85        | 63.75   | 82.2       |
|              | 150      | 300      | 251      | 3.49  | 34.7        | 12.5           | 2.67         | Crimped    | 0.75     | 1025        | 1.00      | 0.60       | 50        | 37.50   | 100.2      |

|                         |     |     |     |      |      |      |      |         |      |      |      |      |    |        |       |
|-------------------------|-----|-----|-----|------|------|------|------|---------|------|------|------|------|----|--------|-------|
|                         | 150 | 300 | 251 | 3.49 | 36.2 | 12.5 | 2.67 | Crimped | 0.75 | 1025 | 1.00 | 0.60 | 50 | 37.50  | 101.0 |
|                         | 150 | 300 | 251 | 3.49 | 37.0 | 12.5 | 2.67 | Crimped | 0.75 | 1050 | 1.00 | 0.70 | 85 | 63.75  | 111.1 |
|                         | 150 | 300 | 251 | 3.49 | 38.3 | 12.5 | 2.67 | Crimped | 0.75 | 1050 | 1.00 | 0.70 | 85 | 63.75  | 104.7 |
| Sahoo & Sharma          | 150 | 300 | 261 | 2.30 | 28.7 | 20.0 | 1.16 | Hooked  | 1.00 | 1100 | 0.50 | 0.75 | 80 | 40.00  | 144.1 |
|                         | 150 | 300 | 261 | 3.45 | 32.9 | 20.0 | 1.95 | Hooked  | 1.00 | 1100 | 0.75 | 0.75 | 80 | 60.00  | 109.5 |
|                         | 150 | 300 | 261 | 3.45 | 23.8 | 20.0 | 1.95 | Hooked  | 1.00 | 1100 | 1.00 | 0.75 | 80 | 80.00  | 94.2  |
|                         | 150 | 300 | 261 | 3.45 | 24.1 | 20.0 | 1.95 | Hooked  | 1.00 | 1100 | 1.25 | 0.75 | 80 | 100.00 | 114.6 |
| Shoaib et al.           | 310 | 308 | 258 | 3.00 | 22.0 | 10.0 | 1.84 | Hooked  | 1.00 | 1100 | 1.00 | 0.50 | 55 | 55.00  | 203.9 |
|                         | 310 | 308 | 258 | 3.00 | 31.0 | 10.0 | 2.45 | Hooked  | 1.00 | 1100 | 1.00 | 0.50 | 55 | 55.00  | 298.9 |
|                         | 300 | 600 | 550 | 3.00 | 30.0 | 10.0 | 1.19 | Hooked  | 1.00 | 1100 | 1.00 | 0.50 | 55 | 55.00  | 311.6 |
| Manju et al.            | 140 | 220 | 175 | 1.50 | 82.0 | 12.0 | 1.28 | Hooked  | 1.00 | 1100 | 0.50 | 0.45 | 80 | 40.00  | 118.6 |
|                         | 140 | 220 | 175 | 1.50 | 83.2 | 12.0 | 1.28 | Hooked  | 1.00 | 1100 | 1.00 | 0.45 | 80 | 80.00  | 155.6 |
|                         | 140 | 220 | 175 | 1.50 | 83.8 | 12.0 | 1.28 | Hooked  | 1.00 | 1100 | 1.50 | 0.45 | 80 | 120.00 | 187.2 |
|                         | 140 | 220 | 175 | 2.50 | 82.0 | 12.0 | 1.28 | Hooked  | 1.00 | 1100 | 0.50 | 0.45 | 80 | 40.00  | 63.5  |
|                         | 140 | 220 | 175 | 2.50 | 83.2 | 12.0 | 1.28 | Hooked  | 1.00 | 1100 | 1.00 | 0.45 | 80 | 80.00  | 80.2  |
|                         | 140 | 220 | 175 | 2.50 | 83.8 | 12.0 | 1.28 | Hooked  | 1.00 | 1100 | 1.50 | 0.45 | 80 | 120.00 | 135.8 |
| Arslan et al.           | 150 | 230 | 200 | 2.50 | 33.7 | 22.0 | 1.34 | Hooked  | 1.00 | 1100 | 1.00 | 0.55 | 55 | 54.50  | 65.4  |
|                         | 150 | 230 | 200 | 2.50 | 24.5 | 22.0 | 1.34 | Hooked  | 1.00 | 1100 | 1.00 | 0.55 | 55 | 54.50  | 44.4  |
|                         | 150 | 230 | 200 | 2.50 | 21.4 | 22.0 | 1.34 | Hooked  | 1.00 | 1100 | 2.00 | 0.55 | 55 | 109.00 | 50.4  |
|                         | 150 | 230 | 200 | 2.50 | 9.8  | 12.0 | 1.34 | Hooked  | 1.00 | 1100 | 3.00 | 0.55 | 55 | 163.50 | 39.4  |
|                         | 150 | 230 | 200 | 3.50 | 20.2 | 22.0 | 1.34 | Hooked  | 1.00 | 1100 | 1.00 | 0.55 | 55 | 54.50  | 33.1  |
|                         | 150 | 230 | 200 | 3.50 | 21.4 | 22.0 | 1.34 | Hooked  | 1.00 | 1100 | 2.00 | 0.55 | 55 | 109.00 | 43.1  |
|                         | 150 | 230 | 200 | 3.50 | 27.9 | 12.0 | 1.34 | Hooked  | 1.00 | 1100 | 3.00 | 0.55 | 55 | 163.50 | 59.1  |
|                         | 150 | 230 | 200 | 4.50 | 24.5 | 22.0 | 1.34 | Hooked  | 1.00 | 1100 | 1.00 | 0.55 | 55 | 54.50  | 43.3  |
|                         | 150 | 230 | 200 | 4.50 | 21.4 | 22.0 | 1.34 | Hooked  | 1.00 | 1100 | 2.00 | 0.55 | 55 | 109.00 | 35.8  |
| Parra-Montesinos et al. | 152 | 457 | 381 | 3.40 | 49.2 | 10.0 | 2.71 | Hooked  | 1.00 | 1100 | 1.00 | 0.51 | 80 | 80.00  | 174.4 |
|                         | 152 | 457 | 381 | 3.40 | 31.0 | 10.0 | 2.71 | Hooked  | 1.00 | 1100 | 1.50 | 0.51 | 60 | 90.00  | 150.7 |
|                         | 152 | 457 | 381 | 3.40 | 44.9 | 10.0 | 2.71 | Hooked  | 1.00 | 1100 | 1.50 | 0.51 | 60 | 90.00  | 191.2 |
|                         | 152 | 457 | 381 | 3.40 | 44.9 | 10.0 | 2.71 | Hooked  | 1.00 | 1100 | 1.50 | 0.51 | 60 | 90.00  | 192.4 |
|                         | 152 | 457 | 381 | 3.40 | 49.2 | 10.0 | 2.71 | Hooked  | 1.00 | 1100 | 1.00 | 0.51 | 80 | 80.00  | 220.2 |
|                         | 152 | 457 | 381 | 3.40 | 31.0 | 10.0 | 2.71 | Hooked  | 1.00 | 1100 | 1.50 | 0.51 | 60 | 90.00  | 197.6 |
|                         | 152 | 457 | 381 | 3.50 | 38.1 | 10.0 | 2.71 | Hooked  | 1.00 | 1100 | 1.00 | 0.51 | 60 | 60.00  | 149.0 |
|                         | 152 | 457 | 381 | 3.50 | 38.1 | 10.0 | 2.71 | Hooked  | 1.00 | 1100 | 1.00 | 0.51 | 60 | 60.00  | 202.8 |

|                      |     |     |     |      |      |      |      |        |      |      |      |      |    |       |       |
|----------------------|-----|-----|-----|------|------|------|------|--------|------|------|------|------|----|-------|-------|
|                      | 152 | 457 | 381 | 3.50 | 38.1 | 10.0 | 1.97 | Hooked | 1.00 | 1100 | 1.00 | 0.51 | 60 | 60.00 | 177.9 |
|                      | 152 | 457 | 381 | 3.50 | 38.1 | 10.0 | 1.97 | Hooked | 1.00 | 1100 | 1.00 | 0.51 | 60 | 60.00 | 181.4 |
| Rosenbusch & Teutsch | 200 | 300 | 260 | 1.50 | 41.2 | 10.0 | 1.81 | Hooked | 1.00 | 1100 | 0.25 | 0.89 | 67 | 16.75 | 279.8 |
|                      | 200 | 300 | 260 | 1.50 | 40.3 | 10.0 | 1.81 | Hooked | 1.00 | 1100 | 0.76 | 0.89 | 67 | 50.92 | 299.5 |
|                      | 200 | 300 | 260 | 2.50 | 40.0 | 10.0 | 1.81 | Hooked | 1.00 | 1100 | 0.25 | 0.89 | 67 | 16.75 | 107.6 |
|                      | 200 | 300 | 260 | 2.50 | 38.7 | 10.0 | 1.81 | Hooked | 1.00 | 1100 | 0.76 | 0.89 | 67 | 50.92 | 144.0 |
|                      | 200 | 300 | 260 | 2.50 | 40.0 | 10.0 | 1.15 | Hooked | 1.00 | 1100 | 0.25 | 0.89 | 67 | 16.75 | 81.6  |
|                      | 200 | 300 | 260 | 2.50 | 38.7 | 10.0 | 1.15 | Hooked | 1.00 | 1100 | 0.76 | 0.89 | 67 | 50.92 | 107.1 |
|                      | 200 | 500 | 460 | 3.40 | 37.7 | 10.0 | 2.80 | Hooked | 1.00 | 1100 | 0.50 | 0.89 | 67 | 33.50 | 243.8 |
|                      | 200 | 500 | 460 | 3.40 | 38.8 | 10.0 | 2.80 | Hooked | 1.00 | 1100 | 0.50 | 0.89 | 67 | 33.50 | 252.1 |
|                      | 200 | 500 | 460 | 3.40 | 37.7 | 10.0 | 2.80 | Hooked | 1.00 | 1100 | 0.50 | 0.89 | 67 | 33.50 | 258.5 |
|                      | 200 | 500 | 460 | 3.40 | 37.7 | 10.0 | 2.80 | Hooked | 1.00 | 1100 | 0.50 | 0.89 | 67 | 33.50 | 263.1 |
|                      | 200 | 300 | 260 | 3.50 | 46.9 | 10.0 | 3.56 | Hooked | 1.00 | 1100 | 0.25 | 0.89 | 67 | 16.75 | 109.7 |
|                      | 200 | 300 | 260 | 3.50 | 43.7 | 10.0 | 3.56 | Hooked | 1.00 | 1100 | 0.51 | 0.89 | 67 | 34.17 | 120.1 |
|                      | 200 | 300 | 260 | 3.50 | 48.3 | 10.0 | 3.56 | Hooked | 1.00 | 1100 | 0.76 | 0.89 | 67 | 50.92 | 155.0 |
|                      | 200 | 300 | 260 | 3.50 | 37.7 | 10.0 | 2.83 | Hooked | 1.00 | 1100 | 0.50 | 0.89 | 67 | 33.50 | 110.8 |
|                      | 200 | 300 | 260 | 3.50 | 38.8 | 10.0 | 2.83 | Hooked | 1.00 | 1100 | 0.50 | 0.89 | 67 | 33.50 | 131.6 |
|                      | 200 | 600 | 540 | 3.50 | 37.7 | 10.0 | 2.73 | Hooked | 1.00 | 1100 | 0.25 | 0.89 | 67 | 16.75 | 153.4 |
|                      | 200 | 600 | 560 | 3.50 | 38.8 | 10.0 | 2.73 | Hooked | 1.00 | 1100 | 0.50 | 0.89 | 67 | 33.50 | 229.6 |
|                      | 200 | 300 | 260 | 4.00 | 41.2 | 10.0 | 1.81 | Hooked | 1.00 | 1100 | 0.25 | 0.89 | 67 | 16.75 | 82.2  |
|                      | 200 | 300 | 260 | 4.00 | 40.3 | 10.0 | 1.81 | Hooked | 1.00 | 1100 | 0.76 | 0.89 | 67 | 50.92 | 117.0 |
| Sahoo et al.         | 150 | 250 | 217 | 1.59 | 35.0 | 10.0 | 1.85 | Hooked | 1.00 | 1100 | 0.75 | 0.75 | 80 | 60.00 | 148.5 |
|                      | 150 | 250 | 217 | 2.47 | 35.0 | 10.0 | 1.85 | Hooked | 1.00 | 1100 | 0.75 | 0.75 | 80 | 60.00 | 98.8  |
|                      | 150 | 250 | 217 | 2.95 | 35.0 | 10.0 | 1.85 | Hooked | 1.00 | 1100 | 0.75 | 0.75 | 80 | 60.00 | 84.8  |
| Amin & Foster        | 300 | 700 | 622 | 2.81 | 34.0 | 10.0 | 1.98 | Hooked | 1.00 | 2300 | 0.32 | 0.90 | 65 | 20.87 | 285.8 |
|                      | 300 | 700 | 622 | 2.81 | 36.0 | 10.0 | 1.98 | Hooked | 1.00 | 2300 | 0.69 | 0.90 | 65 | 44.66 | 355.8 |
| Tahenni et al.       | 100 | 150 | 135 | 2.22 | 64.2 | 15.0 | 1.16 | Hooked | 1.00 | 1100 | 0.50 | 0.54 | 65 | 32.50 | 42.2  |
|                      | 100 | 150 | 135 | 2.22 | 64.2 | 15.0 | 1.16 | Hooked | 1.00 | 1100 | 0.50 | 0.54 | 65 | 32.50 | 44.5  |
|                      | 100 | 150 | 135 | 2.22 | 64.2 | 15.0 | 1.16 | Hooked | 1.00 | 1100 | 0.50 | 0.54 | 65 | 32.50 | 43.2  |
|                      | 100 | 150 | 135 | 2.22 | 64.0 | 15.0 | 1.16 | Hooked | 1.00 | 1100 | 1.00 | 0.54 | 65 | 65.00 | 45.1  |
|                      | 100 | 150 | 135 | 2.22 | 64.0 | 15.0 | 1.16 | Hooked | 1.00 | 1100 | 1.00 | 0.54 | 65 | 65.00 | 47.8  |
|                      | 100 | 150 | 135 | 2.22 | 64.0 | 15.0 | 1.16 | Hooked | 1.00 | 1100 | 1.00 | 0.54 | 65 | 65.00 | 43.0  |
|                      | 100 | 150 | 135 | 2.22 | 60.0 | 15.0 | 1.16 | Hooked | 1.00 | 1100 | 1.00 | 0.75 | 80 | 80.00 | 49.5  |

|                   |     |     |     |      |      |      |      |         |      |      |      |      |     |        |       |
|-------------------|-----|-----|-----|------|------|------|------|---------|------|------|------|------|-----|--------|-------|
|                   | 100 | 150 | 135 | 2.22 | 60.0 | 15.0 | 1.16 | Hooked  | 1.00 | 1100 | 1.00 | 0.75 | 80  | 80.00  | 52.4  |
|                   | 100 | 150 | 135 | 2.22 | 60.0 | 15.0 | 1.16 | Hooked  | 1.00 | 1100 | 1.00 | 0.75 | 80  | 80.00  | 45.2  |
| Narayanan&Darwish | 85  | 150 | 130 | 2.02 | 51.9 | 9.6  | 2.05 | Crimped | 0.75 | 2000 | 0.25 | 0.30 | 100 | 18.75  | 32.9  |
|                   | 85  | 150 | 130 | 2.52 | 51.9 | 9.6  | 2.05 | Crimped | 0.75 | 2000 | 0.25 | 0.30 | 100 | 18.75  | 29.7  |
|                   | 85  | 150 | 130 | 3.02 | 51.9 | 9.6  | 2.05 | Crimped | 0.75 | 2000 | 0.25 | 0.30 | 100 | 18.75  | 30.8  |
|                   | 85  | 150 | 130 | 2.02 | 33.3 | 9.6  | 2.05 | Crimped | 0.75 | 2000 | 0.25 | 0.30 | 100 | 18.75  | 30.1  |
|                   | 85  | 150 | 130 | 2.52 | 33.3 | 9.6  | 2.05 | Crimped | 0.75 | 2000 | 0.25 | 0.30 | 100 | 18.75  | 23.0  |
|                   | 85  | 150 | 130 | 3.02 | 33.3 | 9.6  | 2.05 | Crimped | 0.75 | 2000 | 0.25 | 0.30 | 100 | 18.75  | 21.6  |
|                   | 85  | 150 | 130 | 3.02 | 51.7 | 9.6  | 2.05 | Crimped | 0.75 | 2000 | 0.50 | 0.30 | 133 | 49.88  | 35.9  |
|                   | 85  | 150 | 130 | 3.02 | 30.6 | 9.6  | 2.05 | Crimped | 0.75 | 2000 | 0.50 | 0.30 | 133 | 49.88  | 22.0  |
|                   | 85  | 150 | 130 | 3.02 | 31.0 | 9.6  | 2.05 | Crimped | 0.75 | 2000 | 1.00 | 0.30 | 100 | 75.00  | 33.0  |
|                   | 85  | 150 | 130 | 2.02 | 51.7 | 9.6  | 2.05 | Crimped | 0.75 | 2000 | 0.50 | 0.30 | 133 | 49.88  | 51.2  |
|                   | 85  | 150 | 130 | 2.52 | 51.7 | 9.6  | 2.05 | Crimped | 0.75 | 2000 | 0.50 | 0.30 | 133 | 49.88  | 40.9  |
|                   | 85  | 150 | 130 | 3.52 | 41.7 | 9.6  | 2.05 | Crimped | 0.75 | 2000 | 0.50 | 0.30 | 133 | 49.88  | 29.0  |
|                   | 85  | 150 | 130 | 2.02 | 48.7 | 9.6  | 2.05 | Crimped | 0.75 | 2000 | 1.00 | 0.30 | 133 | 99.75  | 61.7  |
|                   | 85  | 150 | 130 | 2.52 | 48.7 | 9.6  | 2.05 | Crimped | 0.75 | 2000 | 1.00 | 0.30 | 133 | 99.75  | 49.0  |
|                   | 85  | 150 | 130 | 3.52 | 48.8 | 9.6  | 2.05 | Crimped | 0.75 | 2000 | 1.00 | 0.30 | 133 | 99.75  | 33.0  |
|                   | 85  | 150 | 128 | 3.06 | 41.7 | 9.6  | 3.70 | Crimped | 0.75 | 2000 | 0.50 | 0.30 | 133 | 49.88  | 32.4  |
|                   | 85  | 150 | 126 | 3.11 | 41.7 | 9.6  | 5.72 | Crimped | 0.75 | 2000 | 0.50 | 0.30 | 133 | 49.88  | 38.2  |
|                   | 85  | 150 | 128 | 3.06 | 30.6 | 9.6  | 3.70 | Crimped | 0.75 | 2000 | 0.50 | 0.30 | 133 | 49.88  | 24.6  |
|                   | 85  | 150 | 126 | 3.11 | 30.6 | 9.6  | 5.72 | Crimped | 0.75 | 2000 | 0.50 | 0.30 | 133 | 49.88  | 25.1  |
|                   | 85  | 150 | 128 | 3.06 | 48.8 | 9.6  | 3.70 | Crimped | 0.75 | 2000 | 1.00 | 0.30 | 133 | 99.75  | 47.7  |
|                   | 85  | 150 | 126 | 3.11 | 48.8 | 9.6  | 5.72 | Crimped | 0.75 | 2000 | 1.00 | 0.30 | 133 | 99.75  | 53.7  |
|                   | 85  | 150 | 126 | 3.11 | 53.6 | 9.6  | 5.72 | Crimped | 0.75 | 2000 | 1.50 | 0.30 | 100 | 112.50 | 52.1  |
|                   | 85  | 150 | 126 | 3.11 | 43.2 | 9.6  | 5.72 | Crimped | 0.75 | 2000 | 2.00 | 0.30 | 100 | 150.00 | 53.0  |
|                   | 85  | 150 | 128 | 3.06 | 53.6 | 9.6  | 3.70 | Crimped | 0.75 | 2000 | 1.50 | 0.30 | 100 | 112.50 | 48.7  |
|                   | 85  | 150 | 126 | 2.08 | 50.2 | 9.6  | 5.72 | Crimped | 0.75 | 2000 | 0.50 | 0.30 | 100 | 37.50  | 58.6  |
|                   | 85  | 150 | 126 | 2.08 | 45.9 | 9.6  | 5.72 | Crimped | 0.75 | 2000 | 1.00 | 0.30 | 100 | 75.00  | 72.7  |
|                   | 85  | 150 | 126 | 2.08 | 53.6 | 9.6  | 5.72 | Crimped | 0.75 | 2000 | 1.50 | 0.30 | 100 | 112.50 | 76.7  |
|                   | 85  | 150 | 126 | 2.08 | 43.2 | 9.6  | 5.72 | Crimped | 0.75 | 2000 | 2.00 | 0.30 | 100 | 150.00 | 67.6  |
| Cucchiara et al.  | 150 | 250 | 219 | 2.80 | 40.9 | 10.0 | 1.91 | Hooked  | 1.00 | 1115 | 1.00 | 0.50 | 60  | 60.00  | 97.5  |
|                   | 150 | 250 | 219 | 2.80 | 40.9 | 10.0 | 1.91 | Hooked  | 1.00 | 1115 | 2.00 | 0.50 | 60  | 120.00 | 104.4 |
|                   | 150 | 250 | 219 | 2.00 | 43.2 | 10.0 | 1.91 | Hooked  | 1.00 | 1115 | 1.00 | 0.50 | 60  | 60.00  | 116.2 |

|                    |     |     |     |      |      |      |      |                 |      |      |      |      |    |        |       |
|--------------------|-----|-----|-----|------|------|------|------|-----------------|------|------|------|------|----|--------|-------|
|                    | 150 | 250 | 219 | 2.00 | 43.2 | 10.0 | 1.91 | Hooked          | 1.00 | 1115 | 2.00 | 0.50 | 60 | 120.00 | 116.6 |
| Kwak et al.        | 125 | 250 | 212 | 2.00 | 63.8 | 19.0 | 1.52 | Hooked          | 1.00 | 1079 | 0.50 | 0.80 | 63 | 31.25  | 135.4 |
|                    | 125 | 250 | 212 | 2.00 | 68.6 | 19.0 | 1.52 | Hooked          | 1.00 | 1079 | 0.75 | 0.80 | 63 | 46.88  | 144.6 |
|                    | 125 | 250 | 212 | 2.00 | 30.8 | 19.0 | 1.52 | Hooked          | 1.00 | 1079 | 0.50 | 0.80 | 63 | 31.25  | 107.5 |
|                    | 125 | 250 | 212 | 3.00 | 30.8 | 19.0 | 1.52 | Hooked          | 1.00 | 1079 | 0.50 | 0.80 | 63 | 31.25  | 68.2  |
|                    | 100 | 180 | 130 | 3.08 | 38.7 | 10.0 | 3.09 | Straight smooth | 0.50 | 1303 | 1.00 | 0.70 | 60 | 30.00  | 58.7  |
| Lim & Oh           | 100 | 180 | 130 | 3.08 | 42.4 | 10.0 | 3.09 | Straight smooth | 0.50 | 1303 | 2.00 | 0.70 | 60 | 60.00  | 74.8  |
| Dinh et al.        | 152 | 455 | 381 | 3.44 | 44.8 | 10.0 | 1.96 | Hooked          | 1.00 | 1100 | 0.75 | 0.54 | 55 | 41.25  | 172.4 |
|                    | 152 | 455 | 381 | 3.44 | 44.8 | 10.0 | 1.96 | Hooked          | 1.00 | 1100 | 0.75 | 0.54 | 55 | 41.25  | 161.6 |
|                    | 152 | 455 | 381 | 3.44 | 38.1 | 10.0 | 1.96 | Hooked          | 1.00 | 1100 | 1.00 | 0.54 | 55 | 55.00  | 170.8 |
|                    | 152 | 455 | 381 | 3.44 | 38.1 | 10.0 | 1.96 | Hooked          | 1.00 | 1100 | 1.00 | 0.54 | 55 | 55.00  | 173.9 |
|                    | 152 | 455 | 381 | 3.44 | 31.0 | 10.0 | 2.63 | Hooked          | 1.00 | 1100 | 1.50 | 0.54 | 55 | 82.50  | 150.3 |
|                    | 152 | 455 | 381 | 3.44 | 31.0 | 10.0 | 2.63 | Hooked          | 1.00 | 1100 | 1.50 | 0.54 | 55 | 82.50  | 197.9 |
|                    | 152 | 455 | 381 | 3.44 | 44.9 | 10.0 | 2.63 | Hooked          | 1.00 | 1100 | 1.50 | 0.54 | 55 | 82.50  | 192.9 |
|                    | 152 | 455 | 381 | 3.44 | 44.9 | 10.0 | 2.63 | Hooked          | 1.00 | 1100 | 1.50 | 0.54 | 55 | 82.50  | 191.3 |
|                    | 152 | 455 | 381 | 3.44 | 49.2 | 10.0 | 2.63 | Hooked          | 1.00 | 1100 | 1.00 | 0.75 | 80 | 80.00  | 173.9 |
|                    | 152 | 455 | 381 | 3.44 | 49.2 | 10.0 | 2.63 | Hooked          | 1.00 | 1100 | 1.00 | 0.75 | 80 | 80.00  | 220.3 |
|                    | 152 | 455 | 381 | 3.44 | 43.3 | 10.0 | 1.96 | Hooked          | 1.00 | 2300 | 0.75 | 0.38 | 80 | 60.00  | 194.4 |
|                    | 152 | 455 | 381 | 3.44 | 43.3 | 10.0 | 1.96 | Hooked          | 1.00 | 2300 | 0.75 | 0.38 | 80 | 60.00  | 191.3 |
|                    | 205 | 685 | 610 | 3.50 | 50.8 | 10.0 | 1.96 | Hooked          | 1.00 | 1100 | 0.75 | 0.54 | 55 | 41.25  | 369.1 |
|                    | 205 | 685 | 610 | 3.50 | 50.8 | 10.0 | 1.96 | Hooked          | 1.00 | 1100 | 0.75 | 0.54 | 55 | 41.25  | 340.8 |
|                    | 205 | 685 | 610 | 3.50 | 28.7 | 10.0 | 1.96 | Hooked          | 1.00 | 1100 | 0.75 | 0.75 | 80 | 60.00  | 354.8 |
|                    | 205 | 685 | 610 | 3.50 | 28.7 | 10.0 | 1.96 | Hooked          | 1.00 | 1100 | 0.75 | 0.75 | 80 | 60.00  | 347.6 |
|                    | 205 | 685 | 610 | 3.50 | 42.3 | 10.0 | 1.52 | Hooked          | 1.00 | 1100 | 0.75 | 0.54 | 55 | 41.25  | 351.2 |
|                    | 205 | 685 | 610 | 3.50 | 29.6 | 10.0 | 1.52 | Hooked          | 1.00 | 1100 | 0.75 | 0.75 | 80 | 60.00  | 271.2 |
|                    | 205 | 685 | 610 | 3.50 | 29.6 | 10.0 | 1.52 | Hooked          | 1.00 | 1100 | 0.75 | 0.75 | 80 | 60.00  | 228.5 |
|                    | 205 | 685 | 610 | 3.50 | 44.4 | 10.0 | 1.96 | Hooked          | 1.00 | 1100 | 1.50 | 0.54 | 55 | 82.50  | 438.3 |
|                    | 205 | 685 | 610 | 3.50 | 42.8 | 10.0 | 1.96 | Hooked          | 1.00 | 1100 | 1.50 | 0.75 | 80 | 120.00 | 424.3 |
| Lima Araujo et al. | 150 | 390 | 340 | 2.50 | 58.9 | 12.5 | 3.08 | Hooked          | 1.00 | 1150 | 1.00 | 0.54 | 65 | 65.00  | 261.6 |
|                    | 150 | 390 | 340 | 2.50 | 51.7 | 12.5 | 3.08 | Hooked          | 1.00 | 1150 | 2.00 | 0.54 | 65 | 130.00 | 292.1 |
| Casanova et al.    | 150 | 800 | 735 | 3.81 | 42.0 | 12.5 | 1.06 | Hooked          | 1.00 | 1200 | 1.25 | 0.80 | 75 | 93.75  | 359.9 |
|                    | 150 | 800 | 735 | 3.81 | 38.0 | 12.5 | 1.06 | Hooked          | 1.00 | 1200 | 1.25 | 0.50 | 60 | 75.00  | 359.9 |
|                    | 125 | 250 | 225 | 2.89 | 90.0 | 10.0 | 3.49 | Hooked          | 1.00 | 1200 | 1.25 | 0.50 | 60 | 75.00  | 157.8 |

|                    |     |      |     |      |      |      |      |                 |      |      |      |      |    |       |       |
|--------------------|-----|------|-----|------|------|------|------|-----------------|------|------|------|------|----|-------|-------|
| Aoude et al.       | 150 | 250  | 202 | 2.97 | 21.3 | 10.0 | 1.17 | Hooked          | 1.00 | 1100 | 0.50 | 0.55 | 55 | 27.50 | 48.3  |
|                    | 150 | 250  | 202 | 2.97 | 19.6 | 10.0 | 1.17 | Hooked          | 1.00 | 1100 | 1.00 | 0.55 | 55 | 55.00 | 57.3  |
|                    | 300 | 500  | 437 | 3.09 | 21.3 | 10.0 | 1.50 | Hooked          | 1.00 | 1100 | 0.50 | 0.55 | 55 | 27.50 | 161.2 |
|                    | 300 | 500  | 437 | 3.09 | 19.6 | 10.0 | 1.50 | Hooked          | 1.00 | 1100 | 1.00 | 0.55 | 55 | 55.00 | 204.9 |
| Minelli & Plizzari | 200 | 480  | 435 | 2.51 | 24.8 | 20.0 | 1.04 | Hooked          | 1.00 | 1100 | 0.38 | 0.60 | 50 | 19.00 | 134.2 |
|                    | 200 | 480  | 435 | 2.51 | 33.5 | 20.0 | 1.04 | Hooked          | 1.00 | 1100 | 0.38 | 1.00 | 50 | 19.00 | 119.7 |
|                    | 200 | 480  | 435 | 2.51 | 33.5 | 20.0 | 1.04 | Hooked+straight | 0.75 | 1333 | 0.57 | 0.73 | 78 | 33.35 | 141.7 |
|                    | 200 | 480  | 435 | 2.51 | 38.6 | 20.0 | 1.04 | Hooked          | 1.00 | 1100 | 0.38 | 0.60 | 50 | 19.00 | 141.2 |
|                    | 200 | 480  | 435 | 2.51 | 61.1 | 20.0 | 1.04 | Hooked          | 1.00 | 1250 | 0.64 | 0.62 | 48 | 30.72 | 191.2 |
|                    | 200 | 500  | 455 | 2.51 | 24.4 | 15.0 | 0.99 | Hooked          | 1.00 | 1100 | 0.25 | 1.00 | 50 | 12.50 | 196.9 |
|                    | 200 | 500  | 455 | 2.51 | 24.4 | 15.0 | 0.99 | Hooked          | 1.00 | 1100 | 0.25 | 1.00 | 50 | 12.50 | 156.9 |
|                    | 200 | 1000 | 910 | 2.50 | 24.4 | 20.0 | 1.04 | Hooked          | 1.00 | 1100 | 0.25 | 1.00 | 50 | 12.50 | 258.4 |
|                    | 200 | 1000 | 910 | 2.50 | 55.0 | 20.0 | 1.04 | Hooked          | 1.00 | 1100 | 0.25 | 1.00 | 50 | 12.50 | 339.4 |
|                    | 125 | 250  | 210 | 2.00 | 44.6 | 19.0 | 1.53 | Hooked          | 1.00 | 1100 | 0.50 | 0.80 | 63 | 31.25 | 82.1  |
| Kang et al.        | 125 | 250  | 210 | 4.00 | 44.6 | 19.0 | 1.53 | Hooked          | 1.00 | 1100 | 0.50 | 0.80 | 63 | 31.25 | 36.0  |
|                    | 125 | 250  | 210 | 2.00 | 57.2 | 19.0 | 1.53 | Hooked          | 1.00 | 1100 | 0.50 | 0.80 | 63 | 31.25 | 77.7  |
|                    | 125 | 250  | 210 | 2.00 | 57.2 | 19.0 | 1.53 | Hooked          | 1.00 | 1100 | 0.50 | 0.80 | 63 | 31.25 | 77.7  |
| Casanova & Rossi   | 125 | 250  | 225 | 2.89 | 90.0 | 10.0 | 3.49 | Hooked          | 1.00 | 1200 | 1.25 | 0.50 | 60 | 75.00 | 138.8 |
|                    | 125 | 250  | 225 | 2.89 | 90.0 | 10.0 | 3.49 | Hooked          | 1.00 | 1200 | 1.25 | 0.50 | 60 | 75.00 | 138.8 |
| Lim et al.         | 152 | 254  | 221 | 2.50 | 34.0 | 10.0 | 1.20 | Hooked          | 1.00 | 1130 | 0.50 | 0.50 | 60 | 30.00 | 59.0  |
|                    | 152 | 254  | 221 | 1.50 | 34.0 | 10.0 | 2.39 | Hooked          | 1.00 | 1130 | 1.00 | 0.50 | 60 | 60.00 | 148.3 |
|                    | 152 | 254  | 221 | 2.50 | 34.0 | 10.0 | 2.39 | Hooked          | 1.00 | 1130 | 1.00 | 0.50 | 60 | 60.00 | 83.6  |
|                    | 152 | 254  | 221 | 3.50 | 34.0 | 10.0 | 2.39 | Hooked          | 1.00 | 1130 | 1.00 | 0.50 | 60 | 60.00 | 68.4  |
|                    | 152 | 254  | 221 | 1.50 | 34.0 | 10.0 | 2.39 | Hooked          | 1.00 | 1130 | 0.50 | 0.50 | 60 | 30.00 | 135.8 |
|                    | 152 | 254  | 221 | 2.50 | 34.0 | 10.0 | 2.39 | Hooked          | 1.00 | 1130 | 0.50 | 0.50 | 60 | 30.00 | 64.7  |
|                    | 152 | 254  | 221 | 3.50 | 34.0 | 10.0 | 2.39 | Hooked          | 1.00 | 1130 | 0.50 | 0.50 | 60 | 30.00 | 50.4  |
|                    | 152 | 254  | 221 | 3.50 | 34.0 | 10.0 | 2.39 | Hooked          | 1.00 | 1130 | 0.50 | 0.50 | 60 | 30.00 | 50.4  |
| Mansur et al.      | 150 | 225  | 197 | 2.00 | 29.1 | 20.0 | 1.36 | Hooked          | 1.00 | 1260 | 0.50 | 0.50 | 60 | 30.00 | 75.5  |
|                    | 150 | 225  | 197 | 2.80 | 29.1 | 20.0 | 1.36 | Hooked          | 1.00 | 1260 | 0.50 | 0.50 | 60 | 30.00 | 53.2  |
|                    | 150 | 225  | 197 | 3.60 | 29.1 | 20.0 | 1.36 | Hooked          | 1.00 | 1260 | 0.50 | 0.50 | 60 | 30.00 | 45.8  |
|                    | 150 | 225  | 197 | 2.00 | 29.9 | 20.0 | 1.36 | Hooked          | 1.00 | 1260 | 0.75 | 0.50 | 60 | 45.00 | 85.5  |
|                    | 150 | 225  | 197 | 2.80 | 29.9 | 20.0 | 1.36 | Hooked          | 1.00 | 1260 | 0.75 | 0.50 | 60 | 45.00 | 60.7  |
|                    | 150 | 225  | 197 | 2.80 | 29.9 | 20.0 | 2.04 | Hooked          | 1.00 | 1260 | 0.75 | 0.50 | 60 | 45.00 | 65.7  |
|                    | 150 | 225  | 197 | 2.80 | 20.6 | 20.0 | 1.36 | Hooked          | 1.00 | 1260 | 0.75 | 0.50 | 60 | 45.00 | 45.7  |
|                    | 150 | 225  | 197 | 2.80 | 20.6 | 20.0 | 2.04 | Hooked          | 1.00 | 1260 | 0.75 | 0.50 | 60 | 45.00 | 60.7  |

|                   |     |      |      |      |       |      |      |                 |      |      |      |      |    |       |        |
|-------------------|-----|------|------|------|-------|------|------|-----------------|------|------|------|------|----|-------|--------|
|                   | 150 | 225  | 197  | 2.80 | 33.4  | 20.0 | 2.04 | Hooked          | 1.00 | 1260 | 0.75 | 0.50 | 60 | 45.00 | 86.7   |
| Zarrinpour & Chao | 152 | 305  | 254  | 3.50 | 29.0  | 10.0 | 2.48 | Hooked          | 1.00 | 1096 | 0.75 | 0.76 | 67 | 50.25 | 121.0  |
|                   | 610 | 305  | 254  | 3.50 | 29.0  | 10.0 | 2.47 | Hooked          | 1.00 | 1096 | 0.75 | 0.76 | 67 | 50.25 | 482.1  |
|                   | 152 | 457  | 394  | 3.61 | 39.0  | 10.0 | 2.86 | Hooked          | 1.00 | 1096 | 0.75 | 0.76 | 67 | 50.25 | 163.5  |
|                   | 152 | 457  | 394  | 3.61 | 39.0  | 10.0 | 2.86 | Hooked          | 1.00 | 1096 | 0.75 | 0.76 | 67 | 50.25 | 196.5  |
|                   | 203 | 610  | 541  | 3.45 | 50.0  | 10.0 | 2.54 | Hooked          | 1.00 | 1096 | 0.75 | 0.76 | 67 | 50.25 | 272.8  |
|                   | 203 | 610  | 541  | 3.45 | 50.0  | 10.0 | 2.54 | Hooked          | 1.00 | 1096 | 0.75 | 0.76 | 67 | 50.25 | 385.8  |
|                   | 254 | 915  | 813  | 3.50 | 50.0  | 10.0 | 2.70 | Hooked          | 1.00 | 1096 | 0.75 | 0.76 | 67 | 50.25 | 699.5  |
|                   | 254 | 915  | 813  | 3.50 | 50.0  | 10.0 | 2.70 | Hooked          | 1.00 | 1096 | 0.75 | 0.76 | 67 | 50.25 | 720.5  |
|                   | 305 | 1220 | 1118 | 3.50 | 50.0  | 10.0 | 2.55 | Hooked          | 1.00 | 1096 | 0.75 | 0.76 | 67 | 50.25 | 1081.4 |
|                   | 305 | 1220 | 1118 | 3.50 | 50.0  | 10.0 | 2.55 | Hooked          | 1.00 | 1096 | 0.75 | 0.76 | 67 | 50.25 | 1044.4 |
|                   |     |      |      |      |       |      |      |                 |      |      |      |      |    |       |        |
| Noghabai          | 200 | 250  | 180  | 3.33 | 90.6  | 16.0 | 4.47 | Straight smooth | 0.50 | 2600 | 1.00 | 0.15 | 40 | 20.00 | 299.8  |
|                   | 200 | 250  | 180  | 3.33 | 83.2  | 16.0 | 4.47 | Hooked+straight | 0.75 | 1850 | 1.00 | 0.38 | 48 | 36.00 | 295.8  |
|                   | 200 | 250  | 180  | 3.33 | 80.5  | 16.0 | 4.47 | Hooked          | 1.00 | 2200 | 0.50 | 0.70 | 86 | 42.86 | 252.8  |
|                   | 200 | 250  | 180  | 3.33 | 80.5  | 16.0 | 4.47 | Hooked          | 1.00 | 2200 | 0.75 | 0.70 | 86 | 64.29 | 262.8  |
|                   | 200 | 250  | 195  | 3.08 | 39.4  | 16.0 | 3.09 | Hooked+straight | 0.75 | 1850 | 1.00 | 0.38 | 48 | 36.00 | 189.8  |
|                   | 200 | 300  | 235  | 2.77 | 91.4  | 16.0 | 4.28 | Hooked          | 1.00 | 1100 | 1.00 | 0.60 | 50 | 50.00 | 311.0  |
|                   | 200 | 300  | 235  | 2.77 | 93.3  | 16.0 | 4.28 | Straight smooth | 0.50 | 2600 | 1.00 | 0.15 | 40 | 20.00 | 364.0  |
|                   | 200 | 300  | 235  | 2.77 | 89.6  | 16.0 | 4.28 | Hooked+straight | 0.75 | 1850 | 1.00 | 0.38 | 48 | 36.00 | 408.0  |
|                   | 200 | 500  | 410  | 2.93 | 76.8  | 18.0 | 3.06 | Straight smooth | 0.50 | 2600 | 1.00 | 0.15 | 40 | 20.00 | 292.8  |
|                   | 200 | 500  | 410  | 2.93 | 76.8  | 18.0 | 3.06 | Straight smooth | 0.50 | 2600 | 1.00 | 0.15 | 40 | 20.00 | 339.8  |
|                   | 200 | 500  | 410  | 2.93 | 72.0  | 18.0 | 3.06 | Hooked+straight | 0.75 | 1850 | 1.00 | 0.38 | 48 | 36.00 | 370.8  |
|                   | 200 | 500  | 410  | 2.93 | 72.0  | 18.0 | 3.06 | Hooked+straight | 0.75 | 1850 | 1.00 | 0.38 | 48 | 36.00 | 330.8  |
|                   | 200 | 500  | 410  | 2.93 | 69.3  | 18.0 | 3.06 | Hooked          | 1.00 | 2200 | 0.50 | 0.70 | 86 | 42.86 | 267.8  |
|                   | 200 | 500  | 410  | 2.93 | 69.3  | 18.0 | 3.06 | Hooked          | 1.00 | 2200 | 0.50 | 0.70 | 86 | 42.86 | 315.8  |
|                   | 200 | 500  | 410  | 2.93 | 60.2  | 18.0 | 3.06 | Hooked          | 1.00 | 2200 | 0.75 | 0.70 | 86 | 64.29 | 342.8  |
|                   | 200 | 500  | 410  | 2.93 | 75.7  | 18.0 | 3.06 | Hooked          | 1.00 | 2200 | 0.75 | 0.70 | 86 | 64.29 | 295.8  |
|                   | 300 | 700  | 570  | 2.98 | 76.8  | 18.0 | 2.87 | Straight smooth | 0.50 | 2600 | 1.00 | 0.15 | 40 | 20.00 | 458.1  |
|                   | 300 | 700  | 570  | 2.98 | 72.0  | 18.0 | 2.87 | Hooked+straight | 0.75 | 1850 | 1.00 | 0.38 | 48 | 36.00 | 609.1  |
|                   | 300 | 700  | 570  | 2.98 | 60.2  | 18.0 | 2.87 | Hooked          | 1.00 | 2200 | 0.75 | 0.70 | 86 | 64.29 | 522.1  |
|                   |     |      |      |      |       |      |      |                 |      |      |      |      |    |       |        |
| Randl et al.      | 200 | 350  | 314  | 3.50 | 131.5 | 0.4  | 3.50 | Straight smooth | 0.50 | 2000 | 2.00 | 0.20 | 75 | 75.00 | 253.6  |
|                   | 200 | 350  | 314  | 3.50 | 154.5 | 0.4  | 3.50 | Straight smooth | 0.50 | 2000 | 2.00 | 0.20 | 75 | 75.00 | 320.6  |
|                   | 200 | 350  | 314  | 3.50 | 145.6 | 0.4  | 3.50 | Straight smooth | 0.50 | 2000 | 2.00 | 0.20 | 75 | 75.00 | 359.6  |

|                   |     |     |     |      |       |      |      |                 |      |      |      |      |     |        |       |
|-------------------|-----|-----|-----|------|-------|------|------|-----------------|------|------|------|------|-----|--------|-------|
|                   | 200 | 350 | 314 | 3.50 | 132.8 | 0.4  | 3.50 | Straight smooth | 0.50 | 2000 | 1.00 | 0.20 | 75  | 37.50  | 268.6 |
|                   | 200 | 350 | 314 | 3.50 | 143.3 | 0.4  | 3.50 | Straight smooth | 0.50 | 2000 | 1.00 | 0.20 | 75  | 37.50  | 201.6 |
|                   | 200 | 350 | 314 | 3.50 | 152.9 | 0.4  | 3.50 | Straight smooth | 0.50 | 2000 | 1.00 | 0.20 | 75  | 37.50  | 310.6 |
| Ashour et al.     | 125 | 250 | 215 | 2.00 | 92.0  | 10.0 | 0.37 | Hooked          | 1.00 | 260  | 1.00 | 0.80 | 75  | 75.00  | 45.7  |
|                   | 125 | 250 | 215 | 4.00 | 92.6  | 10.0 | 0.37 | Hooked          | 1.00 | 260  | 1.00 | 0.80 | 75  | 75.00  | 24.9  |
|                   | 125 | 250 | 215 | 6.00 | 93.7  | 10.0 | 0.37 | Hooked          | 1.00 | 260  | 1.00 | 0.80 | 75  | 75.00  | 16.3  |
|                   | 125 | 250 | 215 | 1.00 | 99.0  | 10.0 | 2.83 | Hooked          | 1.00 | 260  | 0.50 | 0.80 | 75  | 37.50  | 244.7 |
|                   | 125 | 250 | 215 | 2.00 | 99.1  | 10.0 | 2.83 | Hooked          | 1.00 | 260  | 0.50 | 0.80 | 75  | 37.50  | 130.1 |
|                   | 125 | 250 | 215 | 4.00 | 95.4  | 10.0 | 2.83 | Hooked          | 1.00 | 260  | 0.50 | 0.80 | 75  | 37.50  | 61.9  |
|                   | 125 | 250 | 215 | 6.00 | 95.8  | 10.0 | 2.83 | Hooked          | 1.00 | 260  | 0.50 | 0.80 | 75  | 37.50  | 53.6  |
|                   | 125 | 250 | 215 | 1.00 | 95.3  | 10.0 | 2.83 | Hooked          | 1.00 | 260  | 1.00 | 0.80 | 75  | 75.00  | 342.8 |
|                   | 125 | 250 | 215 | 2.00 | 95.3  | 10.0 | 2.83 | Hooked          | 1.00 | 260  | 1.00 | 0.80 | 75  | 75.00  | 163.4 |
|                   | 125 | 250 | 215 | 4.00 | 97.5  | 10.0 | 2.83 | Hooked          | 1.00 | 260  | 1.00 | 0.80 | 75  | 75.00  | 86.1  |
|                   | 125 | 250 | 215 | 6.00 | 100.5 | 10.0 | 2.83 | Hooked          | 1.00 | 260  | 1.00 | 0.80 | 75  | 75.00  | 53.9  |
|                   | 125 | 250 | 215 | 1.00 | 96.4  | 10.0 | 2.83 | Hooked          | 1.00 | 260  | 1.50 | 0.80 | 75  | 112.50 | 375.3 |
|                   | 125 | 250 | 215 | 2.00 | 96.6  | 10.0 | 2.83 | Hooked          | 1.00 | 260  | 1.50 | 0.80 | 75  | 112.50 | 194.3 |
|                   | 125 | 250 | 215 | 4.00 | 97.1  | 10.0 | 2.83 | Hooked          | 1.00 | 260  | 1.50 | 0.80 | 75  | 112.50 | 95.2  |
|                   | 125 | 250 | 215 | 6.00 | 101.3 | 10.0 | 2.83 | Hooked          | 1.00 | 260  | 1.50 | 0.80 | 75  | 112.50 | 54.4  |
|                   | 125 | 250 | 215 | 2.00 | 94.5  | 10.0 | 4.58 | Hooked          | 1.00 | 260  | 1.00 | 0.80 | 75  | 75.00  | 181.4 |
|                   | 125 | 250 | 215 | 4.00 | 93.8  | 10.0 | 4.58 | Hooked          | 1.00 | 260  | 1.00 | 0.80 | 75  | 75.00  | 105.1 |
|                   | 125 | 250 | 215 | 6.00 | 95.0  | 10.0 | 4.58 | Hooked          | 1.00 | 260  | 1.00 | 0.80 | 75  | 75.00  | 79.9  |
| Tan et al.        | 140 | 375 | 340 | 2.00 | 35.0  | 19.0 | 1.67 | Hooked          | 1.00 | 1100 | 0.50 | 0.50 | 60  | 30.00  | 219.3 |
|                   | 140 | 375 | 340 | 2.00 | 33.0  | 19.0 | 1.67 | Hooked          | 1.00 | 1100 | 0.75 | 0.50 | 60  | 45.00  | 182.2 |
|                   | 140 | 375 | 340 | 2.00 | 36.0  | 19.0 | 1.67 | Hooked          | 1.00 | 1100 | 1.00 | 0.50 | 60  | 60.00  | 211.6 |
|                   | 140 | 375 | 340 | 2.50 | 36.0  | 19.0 | 1.67 | Hooked          | 1.00 | 1100 | 1.00 | 0.50 | 60  | 60.00  | 155.5 |
|                   | 140 | 375 | 340 | 1.50 | 36.0  | 19.0 | 1.67 | Hooked          | 1.00 | 1100 | 1.00 | 0.50 | 60  | 60.00  | 308.3 |
| Pansuk et al.     | 150 | 400 | 350 | 2.86 | 121.1 | 2.0  | 5.61 | Hooked          | 1.00 | 2000 | 0.80 | 0.20 | 65  | 52.00  | 341.5 |
|                   | 150 | 400 | 350 | 2.86 | 120.3 | 2.0  | 5.61 | Hooked          | 1.00 | 2000 | 1.60 | 0.20 | 65  | 104.00 | 532.5 |
| Kim et al.        | 260 | 400 | 340 | 4.00 | 21.0  | 10.0 | 1.72 | Hooked          | 1.00 | 1336 | 0.75 | 0.50 | 60  | 45.00  | 118.1 |
|                   | 260 | 400 | 340 | 4.00 | 56.0  | 10.0 | 1.72 | Hooked          | 1.00 | 1336 | 0.75 | 0.50 | 60  | 45.00  | 208.1 |
| Sharma            | 150 | 300 | 276 | 1.81 | 48.6  | 10.0 | 1.46 | Hooked          | 1.00 | 1100 | 0.96 | 0.60 | 85  | 81.60  | 123.5 |
| Narayanan&Darwish | 100 | 400 | 345 | 0.70 | 52.9  | 5.0  | 3.55 | Crimped         | 0.75 | 2000 | 0.25 | 0.30 | 100 | 18.75  | 350.5 |
|                   | 100 | 400 | 345 | 0.70 | 51.0  | 5.0  | 3.55 | Crimped         | 0.75 | 2000 | 0.50 | 0.30 | 100 | 37.50  | 325.5 |



|              |     |     |     |      |      |      |      |         |      |      |      |      |     |        |       |
|--------------|-----|-----|-----|------|------|------|------|---------|------|------|------|------|-----|--------|-------|
|              | 100 | 400 | 345 | 0.70 | 47.6 | 5.0  | 3.55 | Crimped | 0.75 | 2000 | 0.75 | 0.30 | 100 | 56.25  | 361.5 |
|              | 100 | 400 | 345 | 0.70 | 55.9 | 5.0  | 3.55 | Crimped | 0.75 | 2000 | 1.00 | 0.30 | 100 | 75.00  | 396.5 |
|              | 100 | 400 | 345 | 0.70 | 54.9 | 5.0  | 3.55 | Crimped | 0.75 | 2000 | 1.25 | 0.30 | 100 | 93.75  | 393.5 |
|              | 100 | 400 | 345 | 0.46 | 50.5 | 5.0  | 3.55 | Crimped | 0.75 | 2000 | 1.00 | 0.30 | 100 | 75.00  | 454.5 |
|              | 100 | 400 | 345 | 0.58 | 47.8 | 5.0  | 3.55 | Crimped | 0.75 | 2000 | 1.00 | 0.30 | 100 | 75.00  | 404.5 |
|              | 100 | 400 | 345 | 0.81 | 45.6 | 5.0  | 3.55 | Crimped | 0.75 | 2000 | 1.00 | 0.30 | 100 | 75.00  | 342.5 |
|              | 100 | 400 | 345 | 0.93 | 49.1 | 5.0  | 3.55 | Crimped | 0.75 | 2000 | 1.00 | 0.30 | 100 | 75.00  | 344.5 |
|              | 100 | 400 | 345 | 0.70 | 31.0 | 5.0  | 3.55 | Crimped | 0.75 | 2000 | 1.00 | 0.30 | 100 | 75.00  | 294.5 |
|              | 100 | 400 | 345 | 0.70 | 34.7 | 5.0  | 3.55 | Crimped | 0.75 | 2000 | 1.00 | 0.30 | 100 | 75.00  | 333.5 |
| Li et al.    | 64  | 127 | 102 | 3.00 | 53.0 | 2.4  | 2.20 | Crimped | 0.75 | 1000 | 1.00 | 0.88 | 29  | 21.38  | 16.6  |
|              | 127 | 228 | 204 | 3.00 | 53.0 | 2.4  | 2.21 | Crimped | 0.75 | 1000 | 1.00 | 0.88 | 29  | 21.38  | 51.0  |
|              | 64  | 127 | 102 | 3.00 | 50.2 | 2.4  | 2.20 | Crimped | 0.75 | 1000 | 2.00 | 0.88 | 29  | 42.75  | 20.9  |
|              | 127 | 228 | 204 | 3.00 | 50.2 | 2.4  | 2.21 | Crimped | 0.75 | 1000 | 2.00 | 0.88 | 29  | 42.75  | 66.8  |
|              | 64  | 127 | 102 | 3.00 | 62.6 | 2.4  | 2.20 | Crimped | 0.75 | 1000 | 1.00 | 0.88 | 29  | 21.38  | 17.8  |
|              | 127 | 228 | 204 | 3.00 | 62.6 | 2.4  | 2.21 | Crimped | 0.75 | 1000 | 1.00 | 0.88 | 29  | 21.38  | 61.8  |
|              | 64  | 127 | 102 | 1.00 | 62.6 | 2.4  | 2.20 | Crimped | 0.75 | 1000 | 1.00 | 0.88 | 29  | 21.38  | 50.7  |
|              | 64  | 127 | 102 | 1.50 | 62.6 | 2.4  | 2.20 | Crimped | 0.75 | 1000 | 1.00 | 0.88 | 29  | 21.38  | 33.4  |
|              | 64  | 127 | 102 | 1.75 | 62.6 | 2.4  | 2.20 | Crimped | 0.75 | 1000 | 1.00 | 0.88 | 29  | 21.38  | 30.1  |
|              | 64  | 127 | 102 | 2.00 | 62.6 | 2.4  | 2.20 | Crimped | 0.75 | 1000 | 1.00 | 0.88 | 29  | 21.38  | 25.9  |
|              | 64  | 127 | 102 | 2.25 | 62.6 | 2.4  | 2.20 | Crimped | 0.75 | 1000 | 1.00 | 0.88 | 29  | 21.38  | 23.5  |
|              | 64  | 127 | 102 | 2.50 | 62.6 | 2.4  | 2.20 | Crimped | 0.75 | 1000 | 1.00 | 0.88 | 29  | 21.38  | 20.6  |
|              | 64  | 127 | 102 | 2.75 | 62.6 | 2.4  | 2.20 | Crimped | 0.75 | 1000 | 1.00 | 0.88 | 29  | 21.38  | 17.9  |
|              | 64  | 127 | 102 | 3.00 | 62.6 | 2.4  | 1.10 | Crimped | 0.75 | 1000 | 1.00 | 0.88 | 29  | 21.38  | 12.9  |
|              | 64  | 127 | 102 | 3.00 | 62.6 | 2.4  | 3.30 | Crimped | 0.75 | 1000 | 1.00 | 0.88 | 29  | 21.38  | 17.9  |
|              | 64  | 127 | 102 | 3.00 | 54.1 | 2.4  | 3.30 | Crimped | 0.75 | 1000 | 1.00 | 0.88 | 57  | 42.75  | 25.3  |
|              | 127 | 228 | 204 | 3.00 | 22.7 | 9.0  | 2.21 | Hooked  | 1.00 | 1172 | 1.00 | 0.50 | 60  | 60.00  | 79.5  |
|              | 64  | 127 | 102 | 3.00 | 22.7 | 9.0  | 2.20 | Hooked  | 1.00 | 1172 | 1.00 | 0.50 | 60  | 60.00  | 20.5  |
|              | 64  | 127 | 102 | 3.00 | 22.7 | 9.0  | 1.10 | Hooked  | 1.00 | 1172 | 1.00 | 0.50 | 60  | 60.00  | 15.8  |
|              | 64  | 127 | 102 | 1.50 | 22.7 | 9.0  | 1.10 | Hooked  | 1.00 | 1172 | 1.00 | 0.50 | 60  | 60.00  | 36.6  |
|              | 127 | 228 | 204 | 3.00 | 26.0 | 9.0  | 2.21 | Hooked  | 1.00 | 1172 | 1.00 | 0.50 | 100 | 100.00 | 79.5  |
|              | 64  | 127 | 102 | 3.00 | 26.0 | 9.0  | 2.20 | Hooked  | 1.00 | 1172 | 1.00 | 0.50 | 100 | 100.00 | 23.1  |
| Swamy et al. | 55  | 300 | 265 | 2.00 | 36.5 | 14.0 | 4.31 | Crimped | 0.75 | 1570 | 1.00 | 0.50 | 100 | 75.00  | 80.7  |
|              | 55  | 300 | 265 | 3.43 | 41.9 | 14.0 | 4.31 | Crimped | 0.75 | 1570 | 1.00 | 0.50 | 100 | 75.00  | 59.4  |

|                   |     |     |     |      |      |      |      |          |      |      |      |      |     |       |       |
|-------------------|-----|-----|-----|------|------|------|------|----------|------|------|------|------|-----|-------|-------|
|                   | 55  | 300 | 265 | 4.91 | 36.9 | 14.0 | 4.31 | Crimped  | 0.75 | 1570 | 1.00 | 0.50 | 100 | 75.00 | 42.9  |
|                   | 55  | 300 | 265 | 2.00 | 38.7 | 14.0 | 2.76 | Crimped  | 0.75 | 1570 | 1.00 | 0.50 | 100 | 75.00 | 72.3  |
|                   | 55  | 300 | 265 | 3.43 | 33.9 | 14.0 | 2.76 | Crimped  | 0.75 | 1570 | 1.00 | 0.50 | 100 | 75.00 | 46.0  |
|                   | 55  | 300 | 265 | 4.91 | 36.8 | 14.0 | 2.76 | Crimped  | 0.75 | 1570 | 1.00 | 0.50 | 100 | 75.00 | 43.2  |
|                   | 55  | 300 | 265 | 2.00 | 36.6 | 14.0 | 1.55 | Crimped  | 0.75 | 1570 | 1.00 | 0.50 | 100 | 75.00 | 68.2  |
| Adebar et al.     | 150 | 610 | 560 | 1.63 | 54.1 | 14.0 | 2.14 | Hooked   | 1.00 | 1200 | 0.75 | 0.50 | 60  | 45.00 | 277.7 |
|                   | 150 | 610 | 560 | 1.63 | 49.9 | 14.0 | 2.14 | Hooked   | 1.00 | 1200 | 1.50 | 0.50 | 60  | 90.00 | 325.7 |
|                   | 150 | 610 | 560 | 1.63 | 54.8 | 14.0 | 2.14 | Hooked   | 1.00 | 1200 | 0.40 | 0.50 | 60  | 24.00 | 205.7 |
|                   | 150 | 610 | 560 | 1.63 | 56.5 | 14.0 | 2.14 | Hooked   | 1.00 | 1200 | 0.60 | 0.50 | 60  | 36.00 | 233.7 |
|                   | 150 | 610 | 560 | 1.63 | 46.9 | 14.0 | 2.14 | Hooked   | 1.00 | 1200 | 0.40 | 0.50 | 60  | 24.00 | 248.7 |
|                   | 150 | 610 | 560 | 1.63 | 40.8 | 14.0 | 2.14 | Hooked   | 1.00 | 1200 | 0.60 | 0.50 | 60  | 36.00 | 238.7 |
| Cho & Kim         | 120 | 200 | 168 | 1.43 | 25.7 | 13.0 | 1.32 | Hooked   | 1.00 | 1100 | 0.50 | 0.60 | 60  | 30.00 | 61.1  |
|                   | 120 | 200 | 168 | 1.43 | 25.3 | 13.0 | 1.32 | Hooked   | 1.00 | 1100 | 1.00 | 0.60 | 60  | 60.00 | 79.6  |
|                   | 120 | 200 | 168 | 1.43 | 23.9 | 13.0 | 1.32 | Hooked   | 1.00 | 1100 | 1.50 | 0.60 | 60  | 90.00 | 84.5  |
|                   | 120 | 200 | 168 | 1.43 | 57.8 | 13.0 | 1.32 | Hooked   | 1.00 | 1100 | 0.50 | 0.60 | 60  | 30.00 | 95.4  |
|                   | 120 | 200 | 168 | 1.43 | 61.5 | 13.0 | 1.32 | Hooked   | 1.00 | 1100 | 1.00 | 0.60 | 60  | 60.00 | 103.2 |
|                   | 120 | 200 | 168 | 1.43 | 70.5 | 13.0 | 2.82 | Hooked   | 1.00 | 1100 | 0.50 | 0.60 | 60  | 30.00 | 179.0 |
|                   | 120 | 200 | 168 | 1.43 | 67.3 | 13.0 | 2.82 | Hooked   | 1.00 | 1100 | 1.00 | 0.60 | 60  | 60.00 | 169.7 |
|                   | 120 | 200 | 168 | 1.43 | 67.3 | 13.0 | 2.82 | Hooked   | 1.00 | 1100 | 1.50 | 0.60 | 60  | 90.00 | 186.9 |
|                   | 120 | 200 | 168 | 1.43 | 82.4 | 13.0 | 2.00 | Hooked   | 1.00 | 1100 | 0.50 | 0.60 | 60  | 30.00 | 158.1 |
|                   | 120 | 200 | 168 | 1.43 | 81.1 | 13.0 | 2.00 | Hooked   | 1.00 | 1100 | 1.00 | 0.60 | 60  | 60.00 | 163.0 |
|                   | 120 | 200 | 168 | 1.43 | 86.1 | 13.0 | 2.82 | Hooked   | 1.00 | 1100 | 0.50 | 0.60 | 60  | 30.00 | 153.7 |
|                   | 120 | 200 | 168 | 1.43 | 89.4 | 13.0 | 2.82 | Hooked   | 1.00 | 1100 | 1.00 | 0.60 | 60  | 60.00 | 170.8 |
| Greenough & Nehdi | 200 | 300 | 265 | 3.02 | 47.9 | 10.0 | 1.78 | Hooked   | 1.00 | 1100 | 0.50 | 1.00 | 50  | 25.00 | 92.4  |
|                   | 200 | 300 | 265 | 3.02 | 38.0 | 10.0 | 1.78 | Hooked   | 1.00 | 1100 | 0.75 | 1.00 | 50  | 37.50 | 107.1 |
|                   | 200 | 300 | 265 | 3.02 | 42.2 | 10.0 | 1.78 | Hooked   | 1.00 | 1100 | 1.00 | 1.00 | 50  | 50.00 | 150.4 |
|                   | 200 | 300 | 265 | 3.02 | 45.4 | 10.0 | 1.78 | Flat end | 0.50 | 1100 | 0.50 | 1.00 | 50  | 12.50 | 117.0 |
|                   | 200 | 300 | 265 | 3.02 | 44.4 | 10.0 | 1.78 | Flat end | 0.50 | 1100 | 0.75 | 1.00 | 50  | 18.75 | 145.6 |
|                   | 200 | 300 | 265 | 3.02 | 40.3 | 10.0 | 1.78 | Flat end | 0.50 | 1100 | 1.00 | 1.00 | 50  | 25.00 | 148.3 |
|                   | 200 | 300 | 265 | 3.02 | 53.7 | 10.0 | 1.78 | Flat end | 0.50 | 1100 | 0.50 | 0.70 | 43  | 10.71 | 108.2 |
|                   | 200 | 300 | 265 | 3.02 | 46.0 | 10.0 | 1.78 | Flat end | 0.50 | 1100 | 0.75 | 0.70 | 43  | 16.07 | 124.4 |
|                   | 200 | 300 | 265 | 3.02 | 42.2 | 10.0 | 1.78 | Flat end | 0.50 | 1100 | 1.00 | 0.70 | 43  | 21.43 | 152.9 |
| Kang et al.       | 200 | 355 | 310 | 2.55 | 39.8 | 9.5  | 1.13 | Hooked   | 1.00 | 1100 | 0.38 | 0.75 | 80  | 30.00 | 133.8 |

|                  |     |     |     |      |      |      |      |         |      |      |      |      |     |       |       |
|------------------|-----|-----|-----|------|------|------|------|---------|------|------|------|------|-----|-------|-------|
|                  | 200 | 355 | 285 | 2.77 | 39.8 | 9.5  | 3.33 | Hooked  | 1.00 | 1100 | 0.38 | 0.75 | 80  | 30.00 | 222.9 |
| Dupont & Vewalle | 200 | 300 | 260 | 3.46 | 46.4 | 14.0 | 3.55 | Hooked  | 1.00 | 1100 | 0.25 | 0.92 | 65  | 16.25 | 111.4 |
|                  | 200 | 300 | 260 | 3.46 | 43.2 | 14.0 | 3.55 | Hooked  | 1.00 | 1100 | 0.50 | 0.92 | 65  | 32.50 | 121.4 |
|                  | 200 | 300 | 260 | 3.46 | 47.6 | 14.0 | 3.55 | Hooked  | 1.00 | 1100 | 0.75 | 0.92 | 65  | 48.75 | 156.4 |
|                  | 200 | 300 | 260 | 1.54 | 40.7 | 14.0 | 1.81 | Hooked  | 1.00 | 1100 | 0.25 | 0.92 | 65  | 16.25 | 281.7 |
|                  | 200 | 300 | 260 | 1.54 | 42.4 | 14.0 | 1.81 | Hooked  | 1.00 | 1100 | 0.75 | 0.92 | 65  | 48.75 | 301.7 |
|                  | 200 | 300 | 262 | 2.48 | 39.1 | 14.0 | 1.15 | Hooked  | 1.00 | 1100 | 0.25 | 0.92 | 65  | 16.25 | 84.2  |
|                  | 200 | 300 | 262 | 2.48 | 38.6 | 14.0 | 1.15 | Hooked  | 1.00 | 1100 | 0.75 | 0.92 | 65  | 48.75 | 109.7 |
|                  | 200 | 300 | 260 | 2.50 | 39.1 | 14.0 | 1.81 | Hooked  | 1.00 | 1100 | 0.25 | 0.92 | 65  | 16.25 | 109.7 |
|                  | 200 | 300 | 260 | 2.50 | 38.6 | 14.0 | 1.81 | Hooked  | 1.00 | 1100 | 0.75 | 0.92 | 65  | 48.75 | 145.7 |
|                  | 200 | 300 | 260 | 4.04 | 40.7 | 14.0 | 1.81 | Hooked  | 1.00 | 1100 | 0.25 | 0.92 | 65  | 16.25 | 84.2  |
|                  | 200 | 300 | 260 | 4.04 | 42.4 | 14.0 | 1.81 | Hooked  | 1.00 | 1100 | 0.75 | 0.92 | 65  | 48.75 | 118.7 |
|                  | 200 | 300 | 262 | 2.48 | 26.5 | 14.0 | 1.15 | Hooked  | 1.00 | 1100 | 0.25 | 1.11 | 45  | 11.25 | 101.7 |
|                  | 200 | 300 | 262 | 2.48 | 27.2 | 14.0 | 1.15 | Hooked  | 1.00 | 1100 | 0.75 | 1.11 | 45  | 33.75 | 121.7 |
|                  | 200 | 300 | 260 | 2.50 | 26.5 | 14.0 | 1.81 | Hooked  | 1.00 | 1100 | 0.25 | 1.11 | 45  | 11.25 | 101.7 |
|                  | 200 | 300 | 260 | 2.50 | 27.2 | 14.0 | 1.81 | Hooked  | 1.00 | 1100 | 0.75 | 1.11 | 45  | 33.75 | 121.7 |
|                  | 200 | 300 | 262 | 2.48 | 47.4 | 14.0 | 1.15 | Hooked  | 1.00 | 1100 | 0.50 | 0.92 | 65  | 32.50 | 131.7 |
|                  | 200 | 300 | 260 | 2.50 | 46.8 | 14.0 | 1.81 | Hooked  | 1.00 | 1100 | 0.50 | 0.92 | 65  | 32.50 | 159.2 |
|                  | 200 | 300 | 262 | 2.48 | 45.4 | 14.0 | 1.15 | Hooked  | 1.00 | 1100 | 0.50 | 0.63 | 80  | 40.00 | 149.2 |
|                  | 200 | 350 | 305 | 2.46 | 34.4 | 14.0 | 1.03 | Hooked  | 1.00 | 1100 | 0.57 | 0.75 | 80  | 45.60 | 164.8 |
|                  | 200 | 350 | 305 | 2.46 | 30.2 | 14.0 | 1.03 | Hooked  | 1.00 | 1100 | 0.38 | 0.75 | 80  | 30.40 | 164.8 |
| Swamy & Bahia    | 175 | 250 | 210 | 4.50 | 36.4 | 10.0 | 4.01 | Crimped | 0.75 | 1050 | 0.40 | 0.50 | 100 | 30.00 | 81.0  |
|                  | 175 | 250 | 210 | 4.50 | 38.4 | 10.0 | 4.01 | Crimped | 0.75 | 1050 | 0.80 | 0.50 | 100 | 60.00 | 115.5 |
|                  | 175 | 250 | 210 | 4.50 | 40.8 | 10.0 | 4.01 | Crimped | 0.75 | 1050 | 1.20 | 0.50 | 100 | 90.00 | 116.5 |
|                  | 175 | 250 | 210 | 4.50 | 39.1 | 10.0 | 3.10 | Crimped | 0.75 | 1050 | 0.80 | 0.50 | 100 | 60.00 | 119.7 |
|                  | 175 | 250 | 210 | 4.50 | 38.5 | 10.0 | 4.01 | Crimped | 0.75 | 1050 | 0.80 | 0.50 | 100 | 60.00 | 70.5  |
|                  | 175 | 250 | 210 | 4.50 | 38.5 | 10.0 | 4.01 | Crimped | 0.75 | 1050 | 0.80 | 0.50 | 100 | 60.00 | 70.5  |
| Batson et al.    | 101 | 152 | 127 | 4.80 | 33.2 | 2.0  | 3.09 | Flat    | 0.50 | 1100 | 0.22 | 0.25 | 102 | 11.18 | 28.2  |
|                  | 101 | 152 | 127 | 4.80 | 33.2 | 2.0  | 3.09 | Flat    | 0.50 | 1100 | 0.22 | 0.25 | 102 | 11.18 | 27.8  |
|                  | 101 | 152 | 127 | 4.80 | 33.2 | 2.0  | 3.09 | Flat    | 0.50 | 1100 | 0.22 | 0.25 | 102 | 11.18 | 27.2  |
|                  | 101 | 152 | 127 | 4.80 | 33.2 | 2.0  | 3.09 | Crimped | 0.75 | 1100 | 0.22 | 0.41 | 46  | 7.67  | 28.5  |
|                  | 101 | 152 | 127 | 4.80 | 33.2 | 2.0  | 3.09 | Crimped | 0.75 | 1100 | 0.22 | 0.41 | 46  | 7.67  | 28.5  |
|                  | 101 | 152 | 127 | 4.80 | 33.2 | 2.0  | 3.09 | Crimped | 0.75 | 1100 | 0.22 | 0.41 | 46  | 7.67  | 26.7  |
|                  | 101 | 152 | 127 | 4.80 | 33.2 | 2.0  | 3.09 | Round   | 0.50 | 1100 | 0.22 | 0.25 | 102 | 11.18 | 27.1  |

|     |     |     |      |      |     |      |         |      |      |      |      |     |       |       |
|-----|-----|-----|------|------|-----|------|---------|------|------|------|------|-----|-------|-------|
| 101 | 152 | 127 | 4.40 | 33.2 | 2.0 | 3.09 | Round   | 0.50 | 1100 | 0.22 | 0.25 | 102 | 11.18 | 31.9  |
| 101 | 152 | 127 | 4.20 | 33.2 | 2.0 | 3.09 | Round   | 0.50 | 1100 | 0.22 | 0.25 | 102 | 11.18 | 31.8  |
| 101 | 152 | 127 | 4.20 | 33.2 | 2.0 | 3.09 | Round   | 0.50 | 1100 | 0.22 | 0.25 | 102 | 11.18 | 28.2  |
| 101 | 152 | 127 | 4.20 | 33.2 | 2.0 | 3.09 | Round   | 0.50 | 1100 | 0.22 | 0.25 | 102 | 11.18 | 25.5  |
| 101 | 152 | 127 | 4.30 | 33.2 | 2.0 | 3.09 | Round   | 0.50 | 1100 | 0.22 | 0.25 | 102 | 11.18 | 29.9  |
| 101 | 152 | 127 | 4.30 | 33.2 | 2.0 | 3.09 | Round   | 0.50 | 1100 | 0.22 | 0.25 | 102 | 11.18 | 28.3  |
| 101 | 152 | 127 | 4.20 | 40.2 | 2.0 | 3.09 | Round   | 0.50 | 1100 | 0.44 | 0.25 | 102 | 22.35 | 33.3  |
| 101 | 152 | 127 | 4.00 | 40.2 | 2.0 | 3.09 | Round   | 0.50 | 1100 | 0.44 | 0.25 | 102 | 22.35 | 33.4  |
| 101 | 152 | 127 | 4.00 | 40.2 | 2.0 | 3.09 | Round   | 0.50 | 1100 | 0.44 | 0.25 | 102 | 22.35 | 31.5  |
| 101 | 152 | 127 | 4.00 | 40.2 | 2.0 | 3.09 | Round   | 0.50 | 1100 | 0.44 | 0.25 | 102 | 22.35 | 33.4  |
| 101 | 152 | 127 | 4.40 | 33.2 | 2.0 | 3.09 | Round   | 0.50 | 1100 | 0.22 | 0.25 | 102 | 11.18 | 28.7  |
| 101 | 152 | 127 | 4.40 | 33.2 | 2.0 | 3.09 | Round   | 0.50 | 1100 | 0.22 | 0.25 | 102 | 11.18 | 27.2  |
| 101 | 152 | 127 | 4.00 | 33.2 | 2.0 | 3.09 | Crimped | 0.75 | 1100 | 0.22 | 0.41 | 62  | 10.22 | 30.4  |
| 101 | 152 | 127 | 4.00 | 33.2 | 2.0 | 3.09 | Crimped | 0.75 | 1100 | 0.22 | 0.41 | 62  | 10.22 | 30.5  |
| 101 | 152 | 127 | 4.00 | 33.2 | 2.0 | 3.09 | Crimped | 0.75 | 1100 | 0.22 | 0.41 | 62  | 10.22 | 33.4  |
| 101 | 152 | 127 | 4.60 | 33.2 | 2.0 | 3.09 | Crimped | 0.75 | 1100 | 0.22 | 0.41 | 62  | 10.22 | 26.2  |
| 101 | 152 | 127 | 4.40 | 33.2 | 2.0 | 3.09 | Crimped | 0.75 | 1100 | 0.22 | 0.41 | 62  | 10.22 | 27.4  |
| 101 | 152 | 127 | 4.40 | 33.2 | 2.0 | 3.09 | Crimped | 0.75 | 1100 | 0.22 | 0.41 | 62  | 10.22 | 26.0  |
| 101 | 152 | 127 | 5.00 | 33.2 | 2.0 | 3.09 | Crimped | 0.75 | 1100 | 0.22 | 0.41 | 62  | 10.22 | 24.7  |
| 101 | 152 | 127 | 4.80 | 33.2 | 2.0 | 3.09 | Crimped | 0.75 | 1100 | 0.22 | 0.41 | 62  | 10.22 | 22.6  |
| 101 | 152 | 127 | 4.00 | 40.2 | 2.0 | 3.09 | Crimped | 0.75 | 1100 | 0.44 | 0.41 | 62  | 20.44 | 31.8  |
| 101 | 152 | 127 | 4.20 | 40.2 | 2.0 | 3.09 | Crimped | 0.75 | 1100 | 0.44 | 0.41 | 62  | 20.44 | 34.1  |
| 101 | 152 | 127 | 4.20 | 40.2 | 2.0 | 3.09 | Crimped | 0.75 | 1100 | 0.44 | 0.41 | 62  | 20.44 | 30.4  |
| 101 | 152 | 127 | 4.20 | 40.2 | 2.0 | 3.09 | Crimped | 0.75 | 1100 | 0.44 | 0.41 | 62  | 20.44 | 32.8  |
| 101 | 152 | 127 | 3.20 | 39.7 | 2.0 | 3.09 | Crimped | 0.75 | 1100 | 0.88 | 0.41 | 62  | 40.89 | 37.0  |
| 101 | 152 | 127 | 3.40 | 39.7 | 2.0 | 3.09 | Crimped | 0.75 | 1100 | 0.88 | 0.41 | 62  | 40.89 | 34.6  |
| 101 | 152 | 127 | 3.40 | 39.7 | 2.0 | 3.09 | Crimped | 0.75 | 1100 | 0.88 | 0.41 | 62  | 40.89 | 33.4  |
| 101 | 152 | 127 | 3.40 | 39.7 | 2.0 | 3.09 | Crimped | 0.75 | 1100 | 0.88 | 0.41 | 62  | 40.89 | 42.2  |
| 101 | 152 | 127 | 3.40 | 39.7 | 2.0 | 3.09 | Crimped | 0.75 | 1100 | 0.88 | 0.41 | 62  | 40.89 | 39.8  |
| 101 | 152 | 127 | 2.80 | 39.8 | 2.0 | 3.09 | Crimped | 0.75 | 1100 | 1.76 | 0.41 | 62  | 81.78 | 56.5  |
| 101 | 152 | 127 | 1.80 | 39.8 | 2.0 | 3.09 | Crimped | 0.75 | 1100 | 1.76 | 0.41 | 62  | 81.78 | 77.3  |
| 101 | 152 | 127 | 1.20 | 39.8 | 2.0 | 3.09 | Crimped | 0.75 | 1100 | 1.76 | 0.41 | 62  | 81.78 | 145.4 |
| 101 | 152 | 127 | 1.20 | 39.8 | 2.0 | 3.09 | Crimped | 0.75 | 1100 | 1.76 | 0.41 | 62  | 81.78 | 139.7 |

|              |     |     |     |      |       |      |      |                     |      |      |      |      |     |        |       |
|--------------|-----|-----|-----|------|-------|------|------|---------------------|------|------|------|------|-----|--------|-------|
|              | 101 | 152 | 127 | 4.80 | 33.2  | 2.0  | 3.09 | Crimped             | 0.75 | 1100 | 0.22 | 0.41 | 62  | 10.22  | 24.6  |
|              | 101 | 152 | 127 | 4.80 | 33.2  | 2.0  | 3.09 | Crimped             | 0.75 | 1100 | 0.22 | 0.41 | 62  | 10.22  | 23.7  |
|              | 101 | 152 | 127 | 4.80 | 33.2  | 2.0  | 3.09 | Crimped             | 0.75 | 1100 | 0.22 | 0.41 | 62  | 10.22  | 26.4  |
| Zhao et al.  | 150 | 300 | 260 | 2.00 | 34.5  | 20.0 | 2.52 | Mill-cut            | 0.50 | 700  | 0.50 | 0.92 | 35  | 8.75   | 113.7 |
|              | 150 | 300 | 260 | 2.00 | 36.1  | 20.0 | 2.52 | Mill-cut            | 0.50 | 700  | 1.00 | 0.92 | 35  | 17.50  | 139.2 |
|              | 150 | 300 | 260 | 2.00 | 37.1  | 20.0 | 2.52 | Mill-cut            | 0.50 | 700  | 1.50 | 0.92 | 35  | 26.25  | 156.6 |
|              | 150 | 300 | 260 | 2.00 | 35.3  | 20.0 | 2.52 | Mill-cut            | 0.50 | 700  | 2.00 | 0.92 | 35  | 35.00  | 150.0 |
| Jindal       | 100 | 153 | 127 | 3.60 | 20.7  | 2.0  | 1.99 | Straight mild steel | 0.50 | 4913 | 1.00 | 0.28 | 25  | 12.50  | 21.2  |
|              | 100 | 153 | 127 | 2.00 | 20.7  | 2.0  | 1.99 | Brass-coated steel  | 0.50 | 2350 | 1.00 | 0.25 | 100 | 50.00  | 29.6  |
|              | 100 | 153 | 127 | 2.40 | 20.7  | 2.0  | 1.99 | Brass-coated steel  | 0.50 | 2350 | 1.00 | 0.25 | 100 | 50.00  | 29.6  |
|              | 100 | 153 | 127 | 2.00 | 20.7  | 2.0  | 1.99 | Brass-coated steel  | 0.50 | 2350 | 1.00 | 0.15 | 83  | 41.67  | 40.2  |
|              | 100 | 153 | 127 | 3.60 | 20.7  | 2.0  | 1.99 | Brass-coated steel  | 0.50 | 2350 | 1.00 | 0.15 | 83  | 41.67  | 29.0  |
|              | 100 | 153 | 127 | 4.80 | 20.7  | 2.0  | 1.99 | Brass-coated steel  | 0.50 | 2350 | 1.00 | 0.15 | 83  | 41.67  | 24.8  |
|              | 100 | 153 | 127 | 2.00 | 20.7  | 2.0  | 1.99 | Brass-coated steel  | 0.50 | 2350 | 1.00 | 0.40 | 63  | 31.25  | 33.1  |
| Shin et al.  | 100 | 200 | 175 | 2.00 | 80.0  | 13.0 | 3.59 | Smooth straight     | 0.50 | 1856 | 0.50 | 0.40 | 100 | 25.00  | 119.9 |
|              | 100 | 200 | 175 | 2.00 | 80.0  | 13.0 | 3.59 | Smooth straight     | 0.50 | 1856 | 1.00 | 0.40 | 100 | 50.00  | 129.7 |
|              | 100 | 200 | 175 | 3.00 | 80.0  | 13.0 | 3.59 | Smooth straight     | 0.50 | 1856 | 0.50 | 0.40 | 100 | 25.00  | 56.1  |
|              | 100 | 200 | 175 | 3.00 | 80.0  | 13.0 | 3.59 | Smooth straight     | 0.50 | 1856 | 1.00 | 0.40 | 100 | 50.00  | 72.0  |
|              | 100 | 200 | 175 | 4.50 | 80.0  | 13.0 | 3.59 | Smooth straight     | 0.50 | 1856 | 0.50 | 0.40 | 100 | 25.00  | 49.0  |
|              | 100 | 200 | 175 | 4.50 | 80.0  | 13.0 | 3.59 | Smooth straight     | 0.50 | 1856 | 1.00 | 0.40 | 100 | 50.00  | 60.6  |
| Imam et al.  | 200 | 350 | 300 | 1.75 | 109.5 | 10.0 | 3.08 | Hooked              | 1.00 | 2000 | 0.75 | 0.80 | 75  | 56.25  | 531.1 |
|              | 200 | 350 | 300 | 2.50 | 110.0 | 10.0 | 3.08 | Hooked              | 1.00 | 2000 | 0.75 | 0.80 | 75  | 56.25  | 287.2 |
|              | 200 | 350 | 300 | 3.50 | 111.5 | 10.0 | 3.08 | Hooked              | 1.00 | 2000 | 0.75 | 0.80 | 75  | 56.25  | 211.6 |
|              | 200 | 350 | 300 | 4.50 | 110.8 | 10.0 | 3.08 | Hooked              | 1.00 | 2000 | 0.75 | 0.80 | 75  | 56.25  | 214.7 |
| Huang et al. | 150 | 300 | 255 | 1.96 | 55.8  | 20.0 | 4.93 | Chopped with butt   | 0.50 | 700  | 1.00 | 0.66 | 47  | 23.33  | 254.0 |
| Kwak et al.  | 152 | 305 | 283 | 2.50 | 33.1  | 9.5  | 1.99 | Hooked              | 1.00 | 1100 | 1.00 | 0.51 | 100 | 100.00 | 136.6 |
|              | 152 | 305 | 283 | 2.50 | 33.2  | 9.5  | 1.99 | Hooked              | 1.00 | 1100 | 1.00 | 0.51 | 100 | 100.00 | 145.5 |
|              | 152 | 305 | 283 | 2.50 | 33.0  | 9.5  | 1.99 | Hooked              | 1.00 | 1100 | 2.00 | 0.51 | 100 | 200.00 | 134.4 |
|              | 152 | 305 | 283 | 2.50 | 34.4  | 9.5  | 1.99 | Hooked              | 1.00 | 1100 | 2.00 | 0.51 | 100 | 200.00 | 138.8 |
| Roberts & Ho | 50  | 200 | 170 | 2.41 | 32.1  | 10.0 | 2.37 | Brass-coated steel  | 0.50 | 1100 | 3.00 | 0.38 | 100 | 150.00 | 32.9  |
|              | 50  | 200 | 170 | 2.41 | 39.3  | 10.0 | 2.37 | Brass-coated steel  | 0.50 | 1100 | 4.50 | 0.38 | 100 | 225.00 | 36.3  |
|              | 50  | 200 | 170 | 1.62 | 32.1  | 10.0 | 2.37 | Brass-coated steel  | 0.50 | 1100 | 3.00 | 0.38 | 100 | 150.00 | 51.0  |
|              | 50  | 200 | 170 | 1.62 | 39.3  | 10.0 | 2.37 | Brass-coated steel  | 0.50 | 1100 | 4.50 | 0.38 | 100 | 225.00 | 54.3  |

|                   |     |     |     |      |      |      |      |                    |      |      |      |      |     |        |       |
|-------------------|-----|-----|-----|------|------|------|------|--------------------|------|------|------|------|-----|--------|-------|
|                   | 50  | 200 | 170 | 0.81 | 32.1 | 10.0 | 2.37 | Brass-coated steel | 0.50 | 1100 | 3.00 | 0.38 | 100 | 150.00 | 81.2  |
|                   | 50  | 200 | 170 | 0.81 | 39.3 | 10.0 | 2.37 | Brass-coated steel | 0.50 | 1100 | 4.50 | 0.38 | 100 | 225.00 | 107.6 |
| Hwang et al.      | 100 | 200 | 166 | 3.02 | 39.4 | 10.0 | 3.43 | Hooked             | 1.00 | 1200 | 0.50 | 0.50 | 60  | 30.00  | 30.9  |
|                   | 100 | 200 | 166 | 3.02 | 39.2 | 10.0 | 3.43 | Hooked             | 1.00 | 1200 | 1.00 | 0.50 | 60  | 60.00  | 52.4  |
|                   | 100 | 200 | 166 | 3.02 | 40.0 | 10.0 | 3.43 | Hooked             | 1.00 | 1200 | 1.50 | 0.50 | 60  | 90.00  | 54.4  |
|                   | 100 | 200 | 166 | 3.02 | 35.5 | 10.0 | 3.43 | Hooked             | 1.00 | 1200 | 2.00 | 0.50 | 60  | 120.00 | 47.9  |
|                   | 100 | 200 | 159 | 3.14 | 58.0 | 10.0 | 4.78 | Hooked             | 1.00 | 1200 | 1.00 | 0.50 | 60  | 60.00  | 74.1  |
|                   | 100 | 200 | 159 | 3.14 | 80.1 | 10.0 | 4.78 | Hooked             | 1.00 | 1200 | 0.50 | 0.50 | 60  | 30.00  | 73.1  |
|                   | 100 | 200 | 159 | 3.14 | 88.0 | 10.0 | 4.78 | Hooked             | 1.00 | 1200 | 1.00 | 0.50 | 60  | 60.00  | 81.5  |
| Spinella et al.   | 150 | 250 | 219 | 2.80 | 80.0 | 10.0 | 1.91 | Hooked             | 1.00 | 1100 | 1.00 | 0.55 | 55  | 54.55  | 114.8 |
|                   | 150 | 250 | 219 | 2.00 | 80.0 | 10.0 | 1.91 | Hooked             | 1.00 | 1100 | 1.00 | 0.55 | 55  | 54.55  | 141.9 |
| Chalioris & Sfir  | 100 | 300 | 275 | 2.00 | 28.4 | 9.5  | 0.55 | Hooked             | 1.00 | 1100 | 0.50 | 0.80 | 75  | 37.50  | 43.0  |
| Cohen & Aoude     | 125 | 250 | 212 | 3.77 | 59.4 | 10.0 | 1.52 | Hooked             | 1.00 | 1100 | 0.50 | 0.55 | 55  | 27.27  | 44.3  |
| Aoude & Cohen     | 125 | 250 | 212 | 3.77 | 49.6 | 10.0 | 1.52 | Hooked             | 1.00 | 1100 | 0.50 | 0.38 | 80  | 40.00  | 45.9  |
|                   | 125 | 250 | 210 | 3.81 | 49.7 | 10.0 | 2.28 | Hooked             | 1.00 | 1100 | 0.75 | 0.55 | 55  | 41.25  | 44.9  |
|                   | 125 | 250 | 210 | 3.81 | 51.5 | 10.0 | 2.28 | Hooked             | 1.00 | 1100 | 1.00 | 0.55 | 55  | 55.00  | 58.9  |
|                   | 125 | 250 | 210 | 3.81 | 54.5 | 12.0 | 2.28 | Hooked             | 1.00 | 1100 | 1.00 | 0.55 | 55  | 55.00  | 59.9  |
| Qissab & Salman   | 100 | 170 | 140 | 1.07 | 36.1 | 12.5 | 1.12 | Hooked             | 1.00 | 1100 | 0.50 | 0.80 | 63  | 31.26  | 73.4  |
|                   | 100 | 170 | 140 | 1.07 | 36.9 | 12.5 | 1.12 | Hooked             | 1.00 | 1100 | 0.75 | 0.80 | 63  | 46.89  | 87.1  |
|                   | 100 | 170 | 140 | 2.50 | 36.1 | 12.5 | 1.12 | Hooked             | 1.00 | 1100 | 0.50 | 0.80 | 63  | 31.26  | 40.8  |
|                   | 100 | 170 | 140 | 2.50 | 36.9 | 12.5 | 1.12 | Hooked             | 1.00 | 1100 | 0.75 | 0.80 | 63  | 46.89  | 51.1  |
|                   | 100 | 180 | 150 | 1.00 | 36.1 | 12.5 | 1.05 | Hooked             | 1.00 | 1100 | 0.50 | 0.80 | 63  | 31.26  | 106.7 |
|                   | 100 | 180 | 150 | 1.00 | 36.9 | 12.5 | 1.05 | Hooked             | 1.00 | 1100 | 0.75 | 0.80 | 63  | 46.89  | 126.0 |
|                   | 100 | 180 | 150 | 2.33 | 36.1 | 12.5 | 1.05 | Hooked             | 1.00 | 1100 | 0.50 | 0.80 | 63  | 31.26  | 44.7  |
|                   | 100 | 180 | 150 | 2.33 | 36.9 | 12.5 | 1.05 | Hooked             | 1.00 | 1100 | 0.75 | 0.80 | 63  | 46.89  | 46.9  |
|                   | 100 | 200 | 170 | 2.41 | 36.1 | 12.5 | 0.92 | Hooked             | 1.00 | 1100 | 0.50 | 0.80 | 63  | 31.26  | 42.3  |
|                   | 100 | 200 | 170 | 1.29 | 36.1 | 12.5 | 0.92 | Hooked             | 1.00 | 1100 | 0.50 | 0.80 | 63  | 31.26  | 21.6  |
| Furlan & de Hanai | 100 | 275 | 245 | 0.90 | 36.1 | 12.5 | 0.64 | Hooked             | 1.00 | 1100 | 0.50 | 0.80 | 63  | 31.26  | 51.4  |
|                   | 100 | 100 | 85  | 3.52 | 54.8 | 10.0 | 1.66 | Crimped            | 0.75 | 1100 | 1.00 | 0.20 | 127 | 95.25  | 20.1  |
|                   | 100 | 100 | 85  | 3.52 | 50.0 | 10.0 | 1.66 | Crimped            | 0.75 | 1100 | 2.00 | 0.20 | 127 | 190.50 | 22.1  |
|                   | 100 | 100 | 85  | 3.52 | 49.3 | 10.0 | 1.66 | Crimped            | 0.75 | 1100 | 1.00 | 0.20 | 191 | 142.88 | 21.6  |
|                   | 100 | 100 | 85  | 3.52 | 49.3 | 10.0 | 1.66 | Crimped            | 0.75 | 1100 | 1.00 | 0.20 | 191 | 142.88 | 18.6  |
|                   | 100 | 100 | 85  | 3.52 | 53.7 | 10.0 | 1.66 | Crimped            | 0.75 | 1100 | 2.00 | 0.20 | 191 | 285.75 | 20.1  |

|                              |     |      |     |      |       |      |      |            |      |      |      |      |     |        |        |
|------------------------------|-----|------|-----|------|-------|------|------|------------|------|------|------|------|-----|--------|--------|
|                              | 100 | 100  | 85  | 3.52 | 53.5  | 10.0 | 1.66 | Crimped    | 0.75 | 1100 | 0.50 | 0.20 | 191 | 71.44  | 22.6   |
|                              | 100 | 100  | 85  | 3.52 | 53.5  | 10.0 | 1.66 | Crimped    | 0.75 | 1100 | 0.50 | 0.20 | 191 | 71.44  | 17.6   |
| Danygier & Savir             | 200 | 325  | 273 | 2.75 | 110.9 | 22.0 | 3.48 | Hooked     | 1.00 | 1000 | 0.75 | 0.55 | 64  | 47.73  | 202.2  |
|                              | 200 | 325  | 273 | 2.75 | 109.2 | 22.0 | 3.48 | Hooked     | 1.00 | 1000 | 0.75 | 0.90 | 67  | 50.00  | 210.9  |
| Krassowska & Kosior-Kazberuk | 80  | 180  | 165 | 2.99 | 41.2  | 4.0  | 1.71 | Hooked     | 1.00 | 800  | 1.00 | 1.00 | 50  | 50.00  | 32.9   |
|                              | 80  | 180  | 165 | 2.99 | 39.9  | 4.0  | 1.71 | Hooked     | 1.00 | 800  | 1.50 | 1.00 | 50  | 75.00  | 41.4   |
| Yoo & Yang                   | 300 | 500  | 420 | 3.21 | 62.3  | 20.0 | 3.22 | Hooked     | 1.00 | 1400 | 0.75 | 0.55 | 65  | 48.75  | 417.4  |
|                              | 450 | 750  | 648 | 3.26 | 62.3  | 20.0 | 3.27 | Hooked     | 1.00 | 1400 | 0.75 | 0.55 | 65  | 48.75  | 815.0  |
|                              | 600 | 1000 | 887 | 3.26 | 62.3  | 20.0 | 3.43 | Hooked     | 1.00 | 1400 | 0.75 | 0.55 | 65  | 48.75  | 1480.9 |
| Gali & Subramaniam           | 125 | 250  | 222 | 1.80 | 30.0  | 10.0 | 1.45 | Hooked     | 1.00 | 1225 | 0.50 | 0.75 | 80  | 40.00  | 79.5   |
|                              | 125 | 250  | 222 | 1.80 | 30.0  | 10.0 | 1.45 | Hooked     | 1.00 | 1225 | 0.50 | 0.75 | 80  | 40.00  | 86.5   |
| Zamanzadeh et al.            | 70  | 300  | 270 | 2.56 | 50.0  | 10.0 | 3.32 | Recycled   | 0.75 | 1100 | 0.77 | 0.25 | 58  | 33.45  | 81.6   |
|                              | 110 | 300  | 270 | 2.56 | 50.0  | 10.0 | 2.12 | Recycled   | 0.75 | 1100 | 0.77 | 0.25 | 58  | 33.45  | 96.2   |
|                              | 150 | 300  | 270 | 2.56 | 50.0  | 10.0 | 1.55 | Recycled   | 0.75 | 1100 | 0.77 | 0.25 | 58  | 33.45  | 109.8  |
| Shoaib et al.                | 310 | 308  | 258 | 3.00 | 23.0  | 10.0 | 2.50 | Hooked     | 1.00 | 1100 | 1.00 | 0.55 | 55  | 54.55  | 211.8  |
|                              | 310 | 308  | 240 | 3.00 | 41.0  | 10.0 | 4.03 | Hooked     | 1.00 | 1100 | 1.00 | 0.55 | 55  | 54.55  | 281.7  |
|                              | 310 | 308  | 258 | 3.00 | 41.0  | 10.0 | 2.50 | Hooked     | 1.00 | 1100 | 1.00 | 0.55 | 55  | 54.55  | 278.8  |
|                              | 310 | 308  | 240 | 3.00 | 80.0  | 10.0 | 4.03 | Hooked     | 1.00 | 1100 | 1.00 | 0.55 | 55  | 54.55  | 459.2  |
|                              | 300 | 600  | 531 | 3.00 | 23.0  | 10.0 | 1.88 | Hooked     | 1.00 | 1100 | 1.00 | 0.55 | 55  | 54.55  | 255.2  |
|                              | 300 | 600  | 523 | 3.00 | 23.0  | 10.0 | 2.55 | Hooked     | 1.00 | 1100 | 1.00 | 0.55 | 55  | 54.55  | 245.1  |
|                              | 300 | 600  | 523 | 3.00 | 41.0  | 10.0 | 2.55 | Hooked     | 1.00 | 1100 | 1.00 | 0.55 | 55  | 54.55  | 447.1  |
|                              | 300 | 1000 | 923 | 3.00 | 41.0  | 10.0 | 1.44 | Hooked     | 1.00 | 1100 | 1.00 | 0.55 | 55  | 54.55  | 499.8  |
|                              | 300 | 1000 | 920 | 3.00 | 41.0  | 10.0 | 2.03 | Hooked     | 1.00 | 1100 | 1.00 | 0.55 | 55  | 54.55  | 504.7  |
|                              | 300 | 1000 | 923 | 3.00 | 80.0  | 10.0 | 1.44 | Hooked     | 1.00 | 1100 | 1.00 | 0.55 | 55  | 54.55  | 653.3  |
|                              | 300 | 1000 | 920 | 3.00 | 80.0  | 10.0 | 2.03 | Hooked     | 1.00 | 1100 | 1.00 | 0.55 | 55  | 54.55  | 651.2  |
| Bae et al.                   | 200 | 350  | 300 | 3.50 | 215.0 | 2.0  | 3.60 | Hooked     | 1.00 | 1100 | 2.00 | 0.55 | 55  | 109.09 | 373.5  |
|                              | 200 | 350  | 300 | 2.00 | 199.0 | 2.0  | 3.60 | Hooked     | 1.00 | 1100 | 2.00 | 0.55 | 55  | 109.09 | 586.6  |
| Abdul-Zaher et al.           | 120 | 300  | 266 | 1.13 | 31.9  | 20.0 | 1.26 | Corrugated | 0.75 | 834  | 0.20 | 1.00 | 50  | 7.50   | 126.7  |
|                              | 120 | 300  | 266 | 1.13 | 31.9  | 20.0 | 1.26 | Corrugated | 0.75 | 834  | 0.40 | 1.00 | 50  | 15.00  | 133.2  |
|                              | 120 | 300  | 266 | 1.13 | 31.9  | 20.0 | 1.26 | Corrugated | 0.75 | 834  | 0.60 | 1.00 | 50  | 22.50  | 146.1  |
